# Supplementary material for: Sex-linked deubiquitinase establishes uniparental transmission of chloroplast DNA
Source: PubMed Central journal article supplement (PMC8894339; doi:10.1038/s41467-022-28807-6), 2022-03-03
Supplement: 41467_2022_28807_MOESM1_ESM.pdf [file 41467_2022_28807_MOESM1_ESM.pdf]

## Supplementary Materials for

Sex-linked deubiquitinase establishes uniparental transmission of chloroplast DNA

Sunjoo Joo<sup>1</sup>, Thamali Kariyawasam<sup>1</sup>, Minjae Kim<sup>2</sup>, EonSeon Jin<sup>2</sup>, Ursula Goodenough<sup>3</sup>, and Jae-Hyeok Lee<sup>1\*</sup>.

Correspondence to: [jae-hyeok.lee@botany.ubc.ca](mailto:jae-hyeok.lee@botany.ubc.ca)

**This PDF file includes:**

Supplementary Figs. 1 to 13

Supplementary Tables 1 to 6

Supplementary References 1 to 9

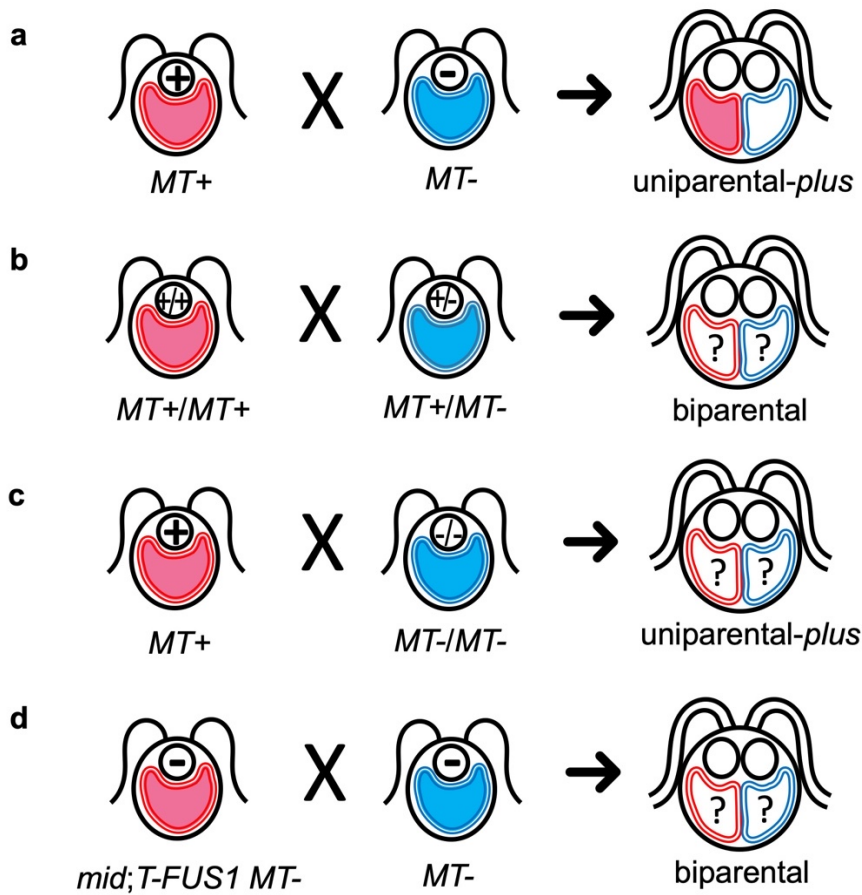

**Supplementary Figure 1.** The dominant control of  $MT^+$  locus for the uniparental inheritance of cpDNA in *C. reinhardtii*. The following genetic experiments postulate two functions genetically linked to  $MT^+$  for the uniparental inheritance of cpDNA: a “protector” function that protects cpDNA from degradation in zygotes and a “destroyer” function (elusive) that controls the onset of cpDNA degradation in early zygotes. **(a)** WT mating between *plus* and *minus* gametes produces uniparental progeny predominantly inheriting *plus*-derived cpDNA. *Minus*-derived cpDNA is completely degraded in zygotes (indicated by empty chloroplasts) (1). **(b)** Mating between  $MT^+/MT^+$  and  $MT^+/MT^-$  diploid gametes produces biparental progeny receiving a mixture of both cpDNAs (2), suggesting that the protection function is linked to  $MT^+$ . However, whether the *minus* cpDNA from  $MT^+/MT^-$  gametes escapes the zygotic degradation remains unknown (indicated by question marks in the zygotic chloroplasts). **(c)** Mating between haploid *plus* ( $MT^+$ ) and diploid *minus* homozygous at mating-type loci ( $MT^-/MT^-$ ) produces progeny predominantly receiving *plus*-contributed cpDNA, suggesting that an imbalance in the amount cpDNA cannot override the  $MT^+$ -dependent “protector” function (2). **(d)** Mating between WT *minus* gametes and *mid*-null  $MT^-$  mutants (thereby behaving as *plus*) harboring *T-FUS1* (allowing the fusion with WT *minus* gametes) produces biparental progeny (3). This phenotype has been explained by the  $MT^+$ -encoded “destroyer” function that is absent in  $MT^-$ .

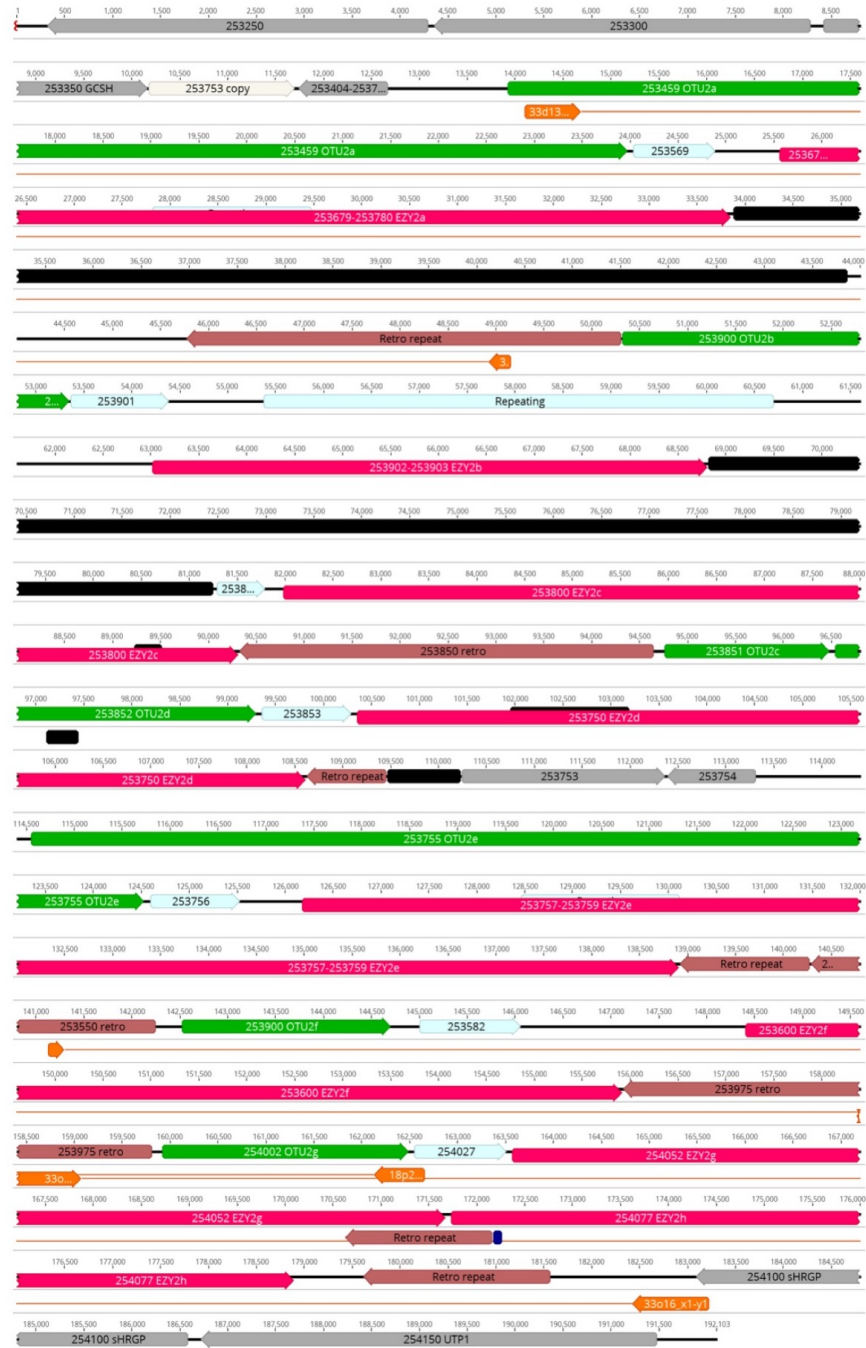

**Supplementary Figure 2.** The gene content of the *OTU2p/EZY2* cluster in the R-domain of *MT+*. The *MT+* R-domain corresponds to 600–792.5 kb in chromosome 6 of v.236 genome at Phytozome (<https://phytozome-next.jgi.doe.gov>). At least seven copies of *OTU2p/EZY2*-containing 16-kb fragments were found, as reported earlier (3). Orange bars indicate the predicted locations of the three BAC clones used in this study. Gene annotations: green, *OTU2p*-A-F copies; magenta, *EZY2* copies; black, sequencing gaps; light blue, the repeating elements located between *OTU2p* and *EZY2* copies; brown, retrotransposon-like repeating elements; gray, genes outside the *OTU2p/EZY2* repeats.

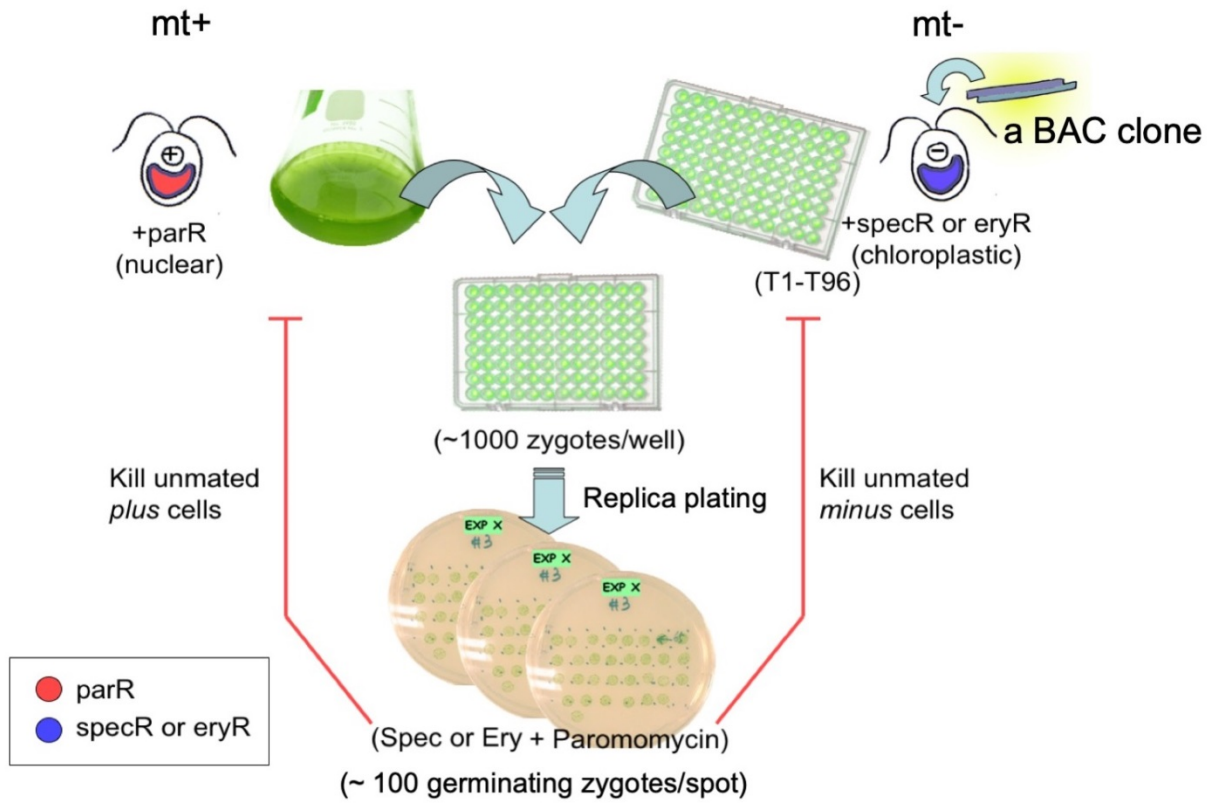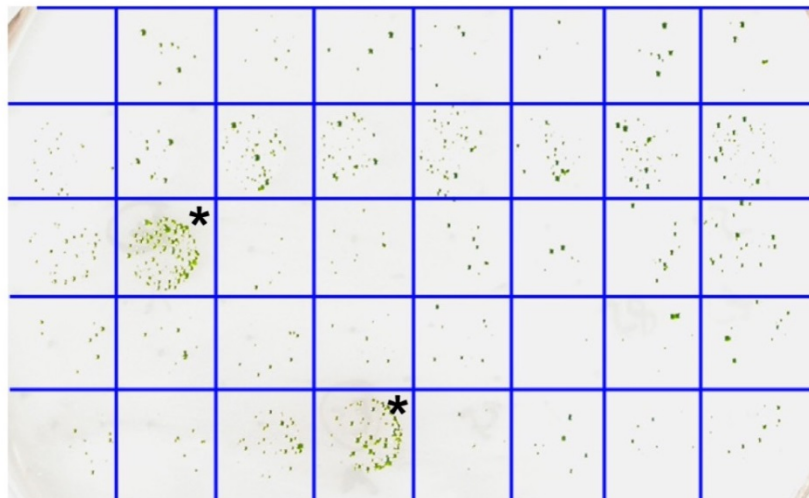

**Supplementary Figure 3.** An experimental scheme for testing the “protector” function. Experimental details are found in Methods. Below the diagram is an example of the screening result, where two of 40 spots show an increase in the number of surviving zygotes (asterisks).

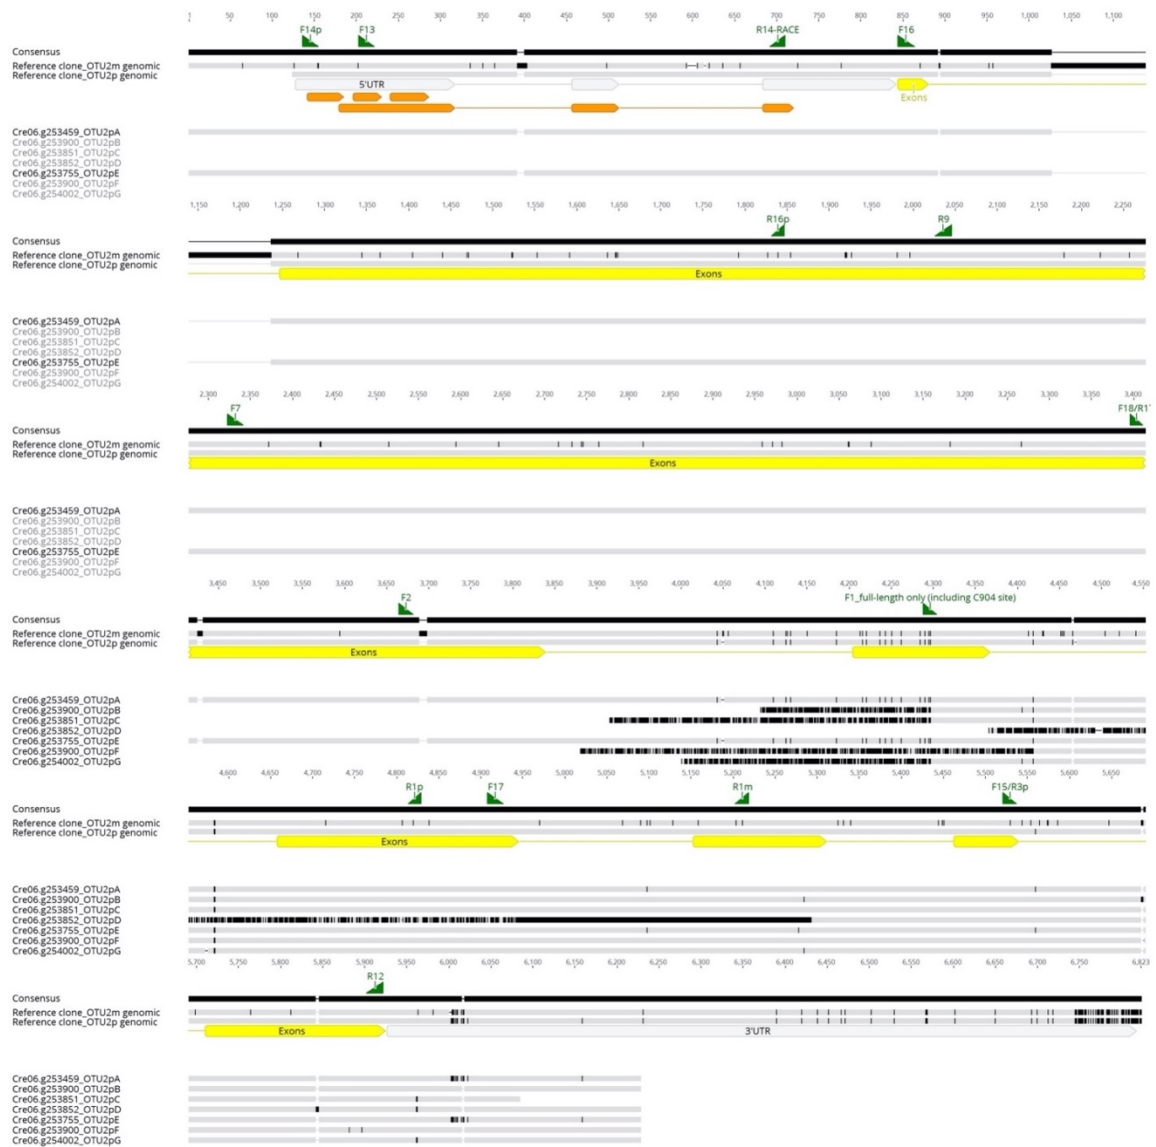

**Supplementary Figure 4.** *OTU2* gene structure and polymorphisms among the *OTU2* alleles. Reference *OTU2p* and *OTU2m* sequences were obtained from the BAC clone 33d13 and the lambda phage clone BJ2 (3), respectively. *OTU2p* and *OTU2m* exon-intron structures were confirmed by cDNA cloning. Nine exons were found with two introns in the 5'-UTR. The *OTU2p* 5'-UTR also contained four open reading frames (orange) that terminate before the ATG start codon of the *OTU2* main open reading frame (yellow). *OTU2p*-A/E copies contain a full-length gene structure, whereas *OTU2p*-B/C/D/F and -G copies are truncated by transposon-like repetitive sequences (indicated by dense black vertical lines between 3900 and 5300 bp), including only the upstream C-terminal segment. None of the truncated *OTU2p* copies include the Cys904 codon, essential for otubain catalysis. Sequences are shaded in gray, where black vertical lines indicate differences among *OTU2* copies. Primers used in this study are indicated by green wedges.

**a**

**Nt** (520)

```

MARKVRETHAALASAI EAAA RASAAA SAALLVPPEAHQLES LIRELQAA
RV GRAGGGNDGAWA SEGLRSGSNTY SRTATAATA STAAGDSYGYQE
VSTSTTDRNNAAC QYMYSSRSLEHAPAQPASPEHMYGLTSPSLAA
ASQRHASSRPGPAAPASSSSGLDYWEGAGPDPSASASASAASAGTAAVDEA
VHALRM REMQRLO QEAAAAARTPGAGGGGTVLGV GGFAREVWGHR
SQQQLAPAPYGG PLASSTSTLTYPWQREYVELYGGSCATAGGRTSNGSR
QQPAESVAIPQTVPASPEKTRPAAQYQASPSLNSAAYD GRSAGLYAAG
DPPATAYAAAPVAAATGQHLGGYSTLAGSSSGDGAGTVNGDYAAVRARLV
AHS SSSV YGSGIGSGYAG GSSSTAPAVAPAAV TVTSGGRSGSTVRL
RMQDAPPSTTAA TSLLSGAAGGGTDLQPQRSRRNHYSDILETAGRTSSR
ARTNGPTG YSA APQPART
  
```

**Mid** (369)

```

RDLSSSVSWRELEAEA EPAAPEAAAHAAA
TWPRGATSVSAVHATSTSRVRTVTQSAQEAPSP AYI PSL QQKPASRT
YDSRS AVPTAP ADSAARVQARFAGPAATNRDDNVSPAPPHASRAYPRG
RGGGDTGT SNGAEPAGAAAPAASPSLSPSPSPHRE HVSSQQLVADTDR
ALELYDEAQLQRAIQLSKQEARAALAAAGMTGLTDSSS RHRDGDKDG
GGDSLGPSSHPRPSSRLRSSP LLEHI RIGGATTPRRVAVAAAM SKAA
LQDDEVGRPGSVATPSRRRLGNQEAGA AASVSPRSTEVQAPPASQAA
AT EPGSSNSSGMLV SALAPLTALHQRYA LLPLLCA
  
```

**Ct** (290)

```

LVSL EDDFPIT
RRVAGDGN CFYRPF LFG LLEHVLAAPDPQLAERLDLVVSRHLARLDEPQF
QQQPPPTSPAANDGRGAGMSPLRLTPARGDPA APN ASPGQPAAAAAAA
GAQVPPRDDPAAYRGGQRLRLRLRTAWFKCPDAPRPSDV S SLERL FNS TE
QSGEVIRFARSLTARELMAAEEFYTFPIPGCGGDYTG LTLRQICERHVLP
MGVEVEQLQIIAACTALGVTLAVLDVAGSAVGAIKHGPAQQHGGPPVAWV
AHLPG HYDVITYR ARPLDVAPGGQLVAII*
  
```

Charge changes ■  
 Radical changes ■  
 Similar changes ■ Otubain domain ■  
 Insertion/Deletion ■ Ub-interacting motif —

**b**

| Changes | Charged     | Radical     | Similar |
|---------|-------------|-------------|---------|
| Nt      | 1.3%        | 1.7%        | 0.6%    |
| Mid     | <b>2.4%</b> | <b>1.9%</b> | 0.0%    |
| Ct      | 0.0%        | 1.0%        | 0.3%    |

**Supplementary Figure 5.** Protein sequence comparison between Otu2p and Otu2m. **(a)** A total of 39 changes were found in 1137 aa. Highlighted sequences indicate aa changes between Otu2p and Otu2m in charged, radical, similar, and insertion/deletion categories by navy, red, light blue, and yellow colors, respectively. Cys904, a critical cysteine for DUB activity, is marked in bold blue in the conserved OTU domain located at the beginning and end of Ct (light red shades). In total, 19, 16, and 4 aa positions differed between Otu2p and Otu2m in the N-terminal, middle, and C-terminal segments, respectively. **(b)** Summary of aa substitution rate per aa category in the three segments.

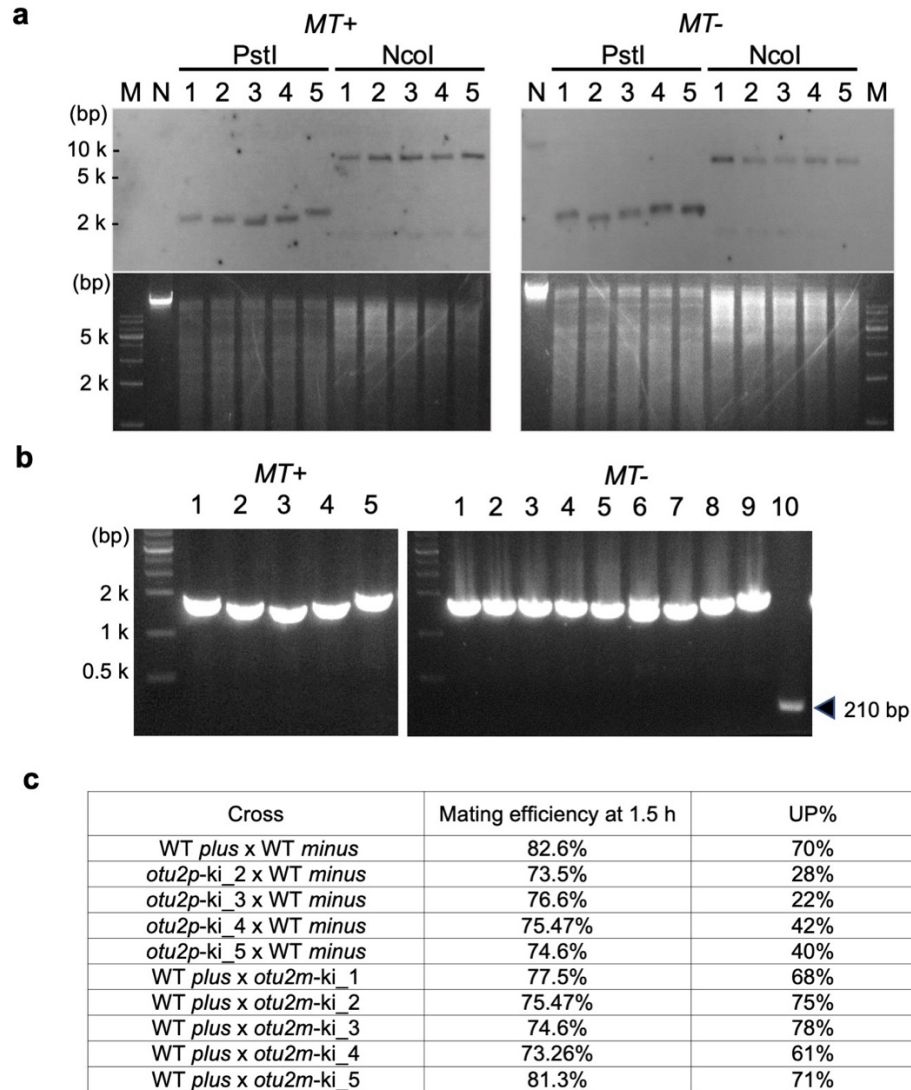

**Supplementary Figure 6.** CRISPR-Cas9-mediated generation of targeted knock-out mutants of *OTU2p* and *OTU2m*. **(a)** Southern blotting confirmed the single-locus insertion of *aphVII*, conferring hygromycin resistance. Wild-type gDNA did not hybridize with the *aphVII* probe. **(b)** gDNA amplification by PCR using the primer pair OTU2-ko-F1 and OTU2-ko-R1p/OTU2-ko-R1m (Supplementary Table 6), and sequencing confirmed insertion of a single copy of *aphVII* (1361 bp) at the 1-CCC/GAG-6 base in the targeted sequence in *otu2p* knock-out mutants #2–5 and all five *otu2m* knock-out mutants. Uninterrupted *OTU2p* or *OTU2m* copies should produce 210-bp products (#10 in *MT-* samples). The lack of 210-bp products indicates the absence of a full-length *OTU2* allele. *OTU2p* knock-out mutant #1 has an insertion at the last site of the targeted sequence (~ATC-23/GCT). The different band sizes are due to 5–101-bp deletions at the insertion sites. **(c)** The mating activities of *otu2p*-ko #2–#5 and *otu2m*-ko #1–#5 and selective cpDNA degradation in zygotes following mating with WT gametes were examined. All *otu2p*-ko mutants showed a significant reduction in the UP rate at 1.5 h after mating. For each sample, a total of 100 zygotes were examined.

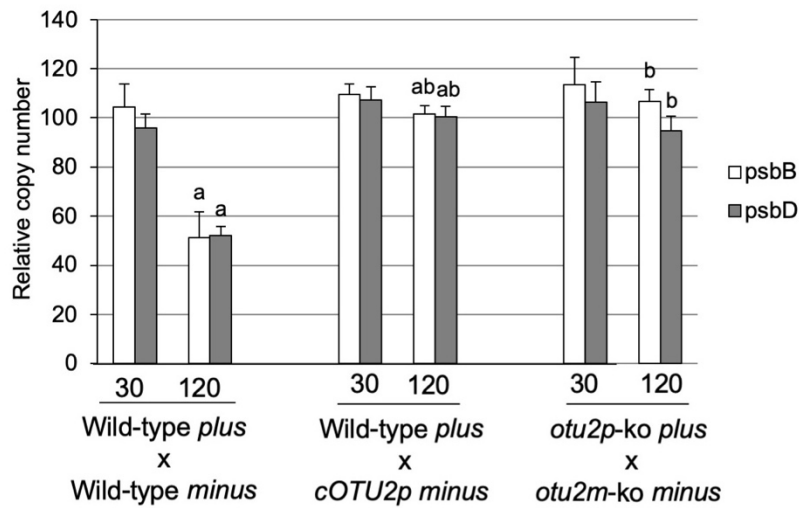

|     |                   | Wild-type 120 min | cOTU2p 120 min | otu2-ko 120 min |
|-----|-------------------|-------------------|----------------|-----------------|
| (a) | 30 min zygotes    | 0.0005            | 0.0118         | 0.4338          |
| (b) | wild-type 120 min | n.a.              | 0.0036         | 0.0018          |

**Supplementary Figure 7.** The lack of chloroplast DNA degradation in biparental zygotes. Changes in relative quantity between nuclear and chloroplastic DNA show that cpDNA mostly survive in biparental zygotes of *otu2p-ko* × *otu2m-ko* and wild-type *plus* × *cOTU2p minus*. gDNA was prepared from the zygotes at the indicated times. Quantitative PCR amplification of two chloroplastic loci (*psbB* and *psbD*) and one nuclear locus (*RCK2*). Relative copy numbers of *psbB* and *psbD* were calculated relative to *RCK2*. Experimental data represent the average ± s.d. from three biological replicates. Letters above the error bars indicate significant differences relative to samples at 30 min (a) or wild-type samples at the same time after mating (b) using student *t*-test (two-tailed,  $p < 0.05$ ). All *p*-values are provided in the table.



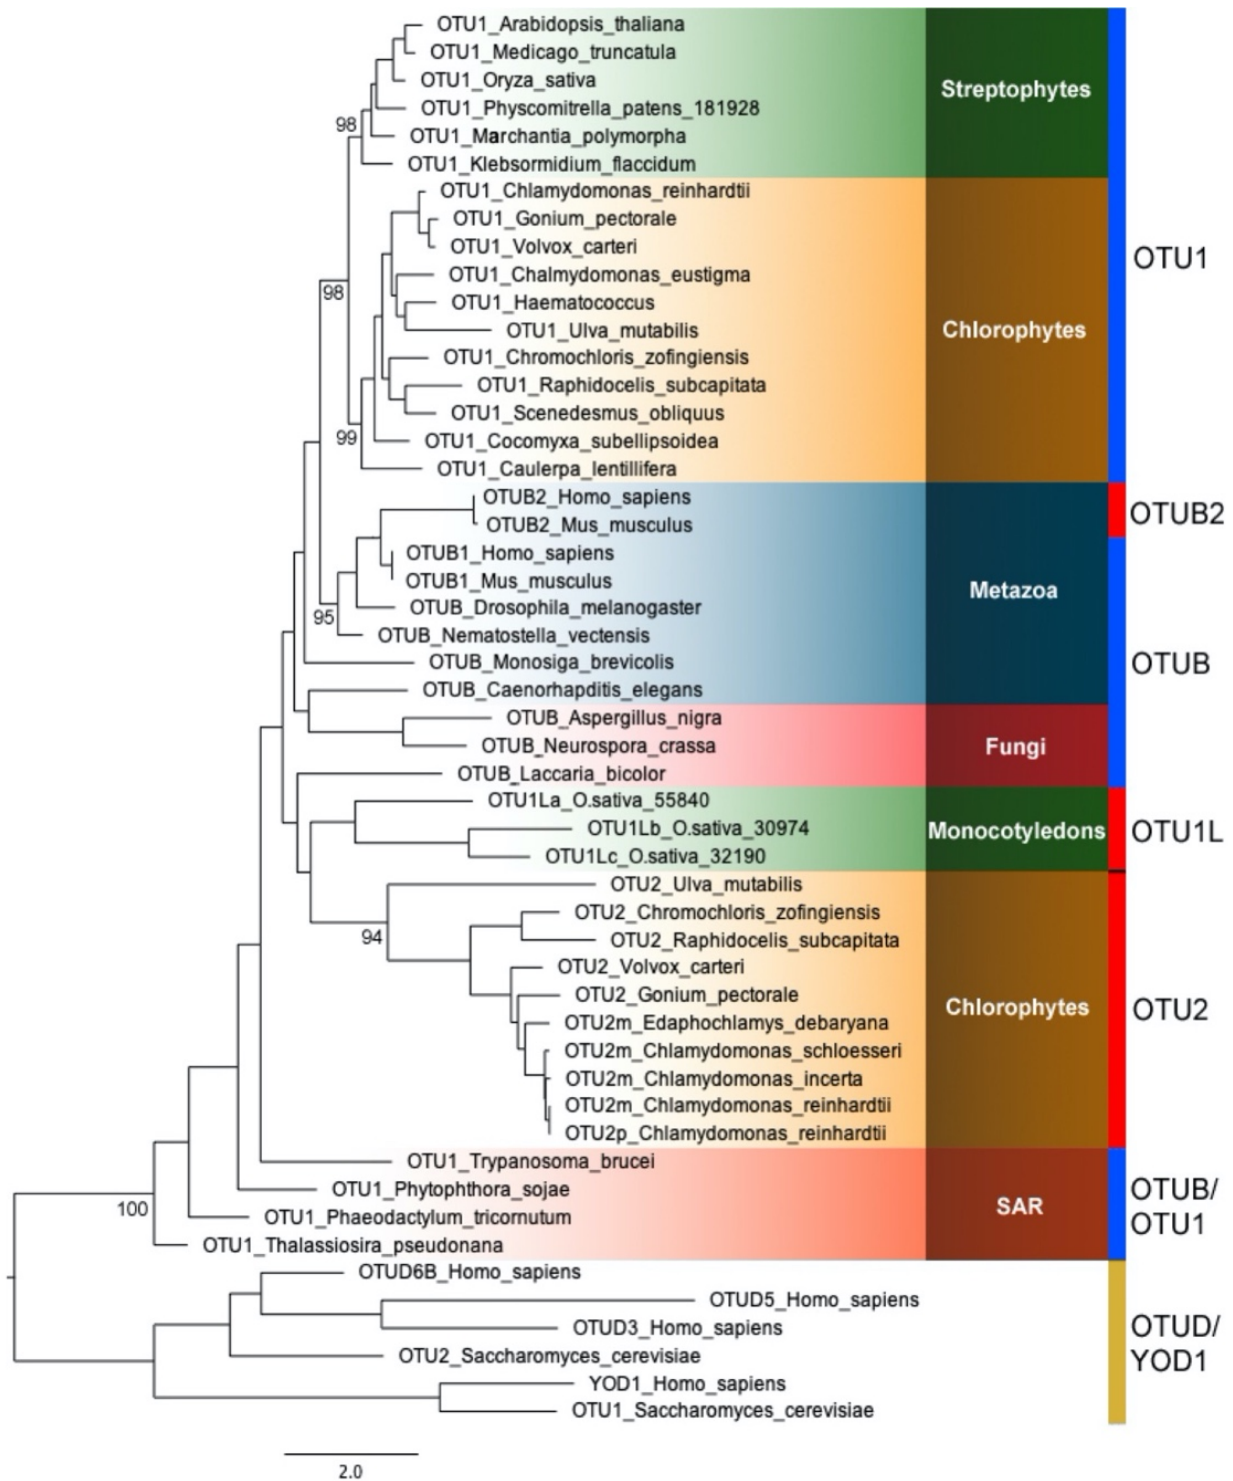

**Supplementary Figure 8.** Maximum likelihood phylogeny of OTU family DUBs. The HMMsearch identified a single member in the majority of genomes with three exceptions (red bars): mammals (OTUB1 and OTUB2), monocotyledonous plants (OTU1 and OTU1L), and Chlorophyceae, including *C. reinhardtii* (OTU1 and OTU2). Most single members formed a well-supported OTU1 clade for Viridiplantae and an OTUB clade for animals (blue bars). No

OTUB members were found in Rhodophyta and Glaucophyta. Single members in the SAR clade (Stramenopiles, Alveolates, and Rhizaria) and Euglenozoa were divergent. Outside the core-Reinhardtina lineage, *Chromochloris zofingiensis* and *Raphidocelis subcapitata* in the Sphaeropleales clade and *Ulva mutabilis* in the Ulvophyceae clade contained an OTU2 member, suggesting a deeper origin of OTU1/OTU2 diversification in Chlorophytes. The tree was reconstructed using IQ-TREE, based on the LG+I+G4 substitution model, and the bootstrap scores at the nodes were calculated by the Ultrafast method. Selected OTUD family members were included as outgroup sequences (yellow bar).

**a**

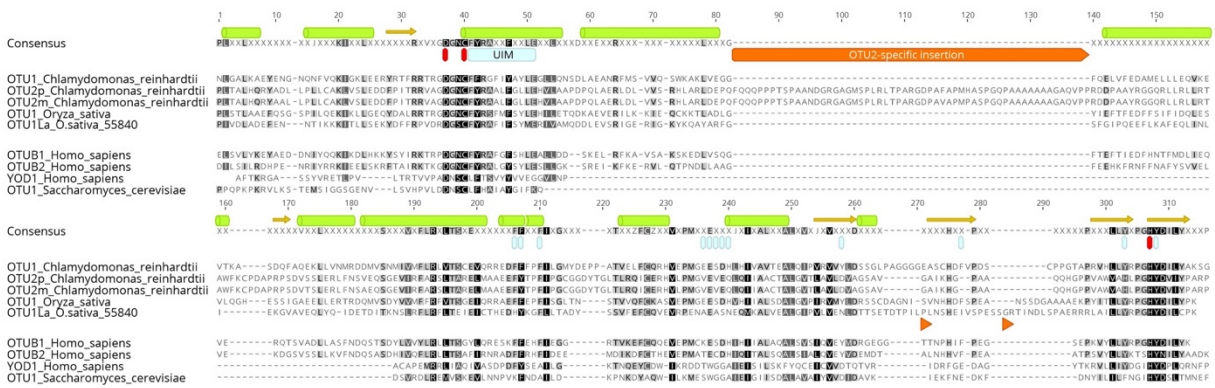

**Supplementary Figure 9.** Alignment of OTU domain aa sequences of the selected OTUB proteins. (a) Alignment of aa sequences for those depicted in Fig. 2a. OTU domains of OTU1 (aa 49–297Δ6), OTU2 (aa 866–1166), OsOTU1 (aa 33–274), OsOTU1La (aa 239–548Δ65), OTUB1 (human, 53–170 aa), OTUB2 (aa 14–234), YOD1 (human, aa 88–238, outgroup), and ScOTU1 (aa 41–232). Predicted alpha-helices and beta-sheets are indicated above as green rods and yellow arrows, respectively. The catalytic triad residues (D, C, and H) for cys-protease and ubiquitin-interacting residues are highlighted by red and light blue, respectively, below the consensus sequence. (b) Alignment of aa sequences of OTU domains used for the phylogeny in Supplementary Fig. 8 (pages 12–19).

b (1/8)

|                                   | 1                 | 10         | 20          | 30          | 40          | 50        | 60       |
|-----------------------------------|-------------------|------------|-------------|-------------|-------------|-----------|----------|
| OTU2p_Chlamydomonas_reinhardtii   |                   |            |             |             |             |           |          |
| OTU2m_Chlamydomonas_reinhardtii   | PLTALHQRYADL---   | LPLLLCAKLV | SLEDDFPITRR | VAGDGNCFYRA | ALFGLLEHVLA | APD       |          |
| OTU2m_Chlamydomonas_incerta       | PLTTLHQRYADL---   | LPLLLCAKLV | SLEDDFPATRR | VAGDGNCFYRA | ALFGLLEHVLA | APD       |          |
| OTU2m_Chlamydomonas_schloesseri   | PLNALHQRYADL---   | LPLLLCAKLV | SLEDDFPITRR | VAGDGNCFYRA | ALFGLLEHVLA | APD       |          |
| OTU2m_Edaphochlamys_debaryana     | PLQALHQRYAEP---   | DPLLLCAKLV | SLEDDFPSVRR | VAGDGNCFYRA | CLFALLEHVLA | EPD       |          |
| OTU2_Volvox_carteri               | PLTVLHQRYAQL---   | DPLLSAKLV  | SLEDDFPITRR | VAGDGNCFYRA | ALFAVLEHVLT | VPD       |          |
| OTU2_Gonium_pectorale             | -----             | -----      | -----       | -----       | -----       | -----     | -----    |
| OTU2_Chromochloris_zofingiensis   | PLGQLIARYEDS---   | SPLLAAKLLS | LEAEFPECRR  | ICDGNCFYR   | GFLFGILLEAL | LLEPN     |          |
| OTU2_Raphidocelis_subcapitata     | PMSRLVERYRLS---   | SPALAAARLA | ALAADFPTR   | CRAVQDGNCF  | YRGFVFALLE  | ALLEQPH   |          |
| OTU2_Ulva_mutabilis               | PIAHLISTCQH---    | KPALKAKLE  | MLLRHFSQYR  | PILGDGNCFY  | RSYAFGMIES  | VLAWGQ    |          |
| OTUB1_Homo_sapiens                | ELSVLYKEYAED---   | DNIYQKIKD  | LHKKYSYIRK  | TRPDGNCFYR  | AFGFSHLEAL  | LDD--     |          |
| OTUB1_Mus_musculus                | ELSVLYKEYAED---   | DNIYQKIKD  | LHKKYSYIRK  | TRPDGNCFYR  | AFGFSHLEAL  | LDD--     |          |
| OTUB_Drosophila_melanogaster      | PLTCLYAEYSG---    | DEIFTAKIQ  | DLSKKYKFR   | RRTRPDGNCF  | FRFAFYSYLE  | YLISN--   |          |
| OTUB_Caenorhapditiis_elegans      | PFSILCAEYDNET---  | SAAFLSKATE | LSEVYGEIRY  | IRGDGNCFYR  | AILVGLIEIM  | LKD--     |          |
| OTUB_Nematostella_vectensis       | -----             | -----      | -----       | -----       | -----       | -----     | -----    |
| OTUB2_Homo_sapiens                | DILSILRDHPE---    | NRIYRRKIE  | ELSKRFTAIR  | KTKDGNCFYR  | ALGYSYLES   | LGLK--    |          |
| OTUB2_Mus_musculus                | DILSILRDHPE---    | NRIYRQKIQ  | ELSKRFTSIR  | KTKDGNCFYR  | ALGYSYLES   | LGLK--    |          |
| OTUB_Monosiga_brevicollis         | GIDVLLAEYP---     | DPLFHTKLE  | TLQRRQASFR  | RRTRDGNCFY  | RSYAFGILEH  | LQLH--    |          |
| OTU1_Arabidopsis_thaliana         | PLSSLAAYQSG---    | SPILEKIKI  | LDSQYIGIR   | RRTRDGNCF   | FRSFMFSYLE  | HILESQD   |          |
| OTU1_Medicago_tranculata          | PLSLLAAEYQSG---   | SPILEKIKI  | KVLDGQYAA   | IRRRTRDGNCF | FRSFMFSYLE  | HILEAQD   |          |
| OTU1_Oryza_sativa                 | PLSTLAAEFQSG---   | SPILEKIKI  | LGEQYDALR   | RRTRDGNCFY  | RSFMFSYLE   | HILETQD   |          |
| OTU1La_O.sativa_55840             | PIVDLADEFEN---    | NTIKKKITL  | LSEKYDFFR   | PVDRDGS     | CFYRAFI     | FYSYMERIV | AMQD     |
| OTU1Lb_O.sativa_30974             | ANHYFRNIDNSFQ---  | QPEVGLRL   | KYLSHHYSE   | FRPVHRDEE   | CFYRSFI     | FYSYLEQV  | VDSIG    |
| OTU1Lc_O.sativa_32190             | PLASAPEHYGLR      | SGLRRIMSAN | LILLNEYSDF  | FRP-----    | -----       | -----     | EQVLD    |
| OTU1_Marchantia_polymorpha        | PLSVLAAEYQSG---   | NPVFRAKV   | EKLGQTYVA   | IRRRARGDGN  | CFRFSFMFSY  | LEHILETRD |          |
| OTU1_Physcomitrella_patens_181928 | PLSVLEEEYKAG---   | SRVFLAKL   | QLLQKQYGA   | IRRRARGDGN  | CFRFSFMFSY  | LEHLLVTQD |          |
| OTU1_Klebsormidium_flaccidum      | PLSALAAEYERG---   | NEVFKAKI   | QKLGETYGS   | IRRRTRDGN   | CFRFGFMFAY  | LERLLHSQD |          |
| OTU1_Haematococcus_pluvialis      | DLSVLKAEYEAG---   | SDVWVRKI   | EWLEHKF     | SHFRTRDGN   | CFYRAFI     | FYSYLEG   | LLQNSD   |
| OTU1_Chlamydomonas_reinhardtii    | NLGALKAEYENG---   | NQNFVQKI   | GKLEERYR    | FRTRDGNCF   | FRGFYAYLE   | GLLQNSD   |          |
| OTU1_Gonium_pectorale             | PMSALKEEYING---   | NQNFVQKI   | AKLEASYST   | FRTRDGNCF   | FRGFYYSY    | LESLLARD  |          |
| OTU1_Volvox_carteri               | PMSALKEEYING---   | NQNFVQKI   | GKLEASYGT   | FRTRDGNCF   | FRGFYAYLE   | NLLTHD    |          |
| OTU1_Chlamydomonas_eustigma       | DMSCLKTEYQNG---   | NFVFLKKI   | DLSLQATYSS  | YRTRDGNCFY  | RAFLRYLES   | LLEDDEN   |          |
| OTU1_Chromochloris_zofingiensis   | PLASLKAEYSAG---   | SDVFIKIE   | LLERDFTC    | MRTRDGNCFY  | RSFIYAYLE   | WLLATDN   |          |
| OTU1_Raphidocelis_subcapitata     | TLESMLQDYRA---    | YPVFAKIR   | SLASRYGG    | IRRVSDGNCF  | FRATAFGLLE  | WLLVNEA   |          |
| OTU1_Scenedesmus_obliquus         | SLDALKAEYANG---   | SQVFVAKI   | SNLQTYSS    | MRTRDGNCF   | FRSFIYGY    | LEWLLHQ   |          |
| OTU1_Ulva_mutabilis               | QVLSLREEYQDS---   | SSTFVAKV   | EYLCSDYTF   | IRTRDGNCFY  | RAFLYGLLE   | ALLVTRA   |          |
| OTU1_Caulerpa_lentillifera        | -----             | -----      | -----       | -----       | -----       | -----     | -----    |
| OTU1_Cocomyxa_subellipsoidea      | PLSALEEEYRQ---    | SAVFRDKI   | RSLETQYGS   | MRTRDGNCF   | FRSFMFAFME  | QLVQNN    |          |
| OTU1_Thalassiosira_pseudonana     | PIDALVAQYSSSN---  | DGGFLQSA   | NLLSQYTH    | LRIRGDGNCFY | RAFLYLS     | SEDNSKD-- |          |
| OTU1_Phaeodactylum_tricornutum    | PILDCLKLEYNESN--- | ESRFLDGV   | DALSKEYQS   | FRKVRDGNCFY | RAFLYRLVEE  | IRQN--    |          |
| OTU1_Phytophthora_sojae           | SPLCLKAEYVGNV---  | NANFMHGIE  | SLNARYEAL   | RRVRDGNCF   | FRGFIFALCER | LLPDS     |          |
| OTU1_Trypanosoma_brucei           | DGCNLMTEFSD---    | NPPMLVKV   | VVSLKTYK    | IGIRYARRDGN | CFYRSVVF    | GMHESLLN  | NKE      |
| OTU1_Laccaria_bicolor             | PMSNLREEYENG---   | SAAFVNQI   | DLSLTARY    | DSVRRTRDGN  | CFYRS       | LAFAYVERI | LQSPE    |
| OTU1_Aspergillus_nigra            | SSSVIAMEYANA---   | DPAFATKS   | NALALTHP    | WTRTMKGDGN  | CGWRAVAF    | GFENLL-L  | QNL      |
| OTU1_Neurospora_crassa            | PSTAITEEYAKA---   | DPVYVQKT   | QSLP        | PVYSHYR     | PMLDGNCG    | WRAIGFGY  | FETLIK   |
| YOD1_Homo_sapiens                 | ---AFTKRGA---     | SSYVRET    | LPV---      | LTRTVVPAD   | NSCLFTSV    | YVVVEGG   | VLPN--   |
| OTU1_Saccharomyces_cerevisiae     | PPQPKPKRVLS---    | TEMSIGGS   | GENV---     | LSVHPVLD    | DNCLFHA     | IAYGIF    | FKQ---   |
| OTUD6B_Homo_sapiens               | EIENLTGARHME---   | SEKLAQI    | LAAARQ---   | LEIKQIP     | SDGHCMYKA   | IEDQLKE   | KDCA---  |
| OTU2_Saccharomyces_cerevisiae     | ALEASKQPD         | LKMM---    | EQESIDQ     | LCELKK---   | LKQFDI      | QPDGH     | CLFASILD |
| OTUD5_Homo_sapiens                | IEAMD             | PATVE      | QQ---       | EHWF        | EKALR       | DKK---    | FIKQ     |
| OTUD3_Homo_sapiens                | PESGGGGG          | CEEE---    | FVSFAN      | QLQALG---   | LKLE        | REVP      | GDGNCL   |

**b (2/8)**

OTU2p\_Chlamydomonas\_reinhardtii ---PQLAERLDL-VVS-RHLARLDEPQFQQQP---PPTSP-AANDGRGAGMSPLRLTPAR  
OTU2m\_Chlamydomonas\_reinhardtii ---PQLAERLDL-VVS-RHLARLDEPQFQQQP---PPTSP-AANDGRGAGMSPLRLTPAR  
OTU2m\_Chlamydomonas\_incerta ---PKLAERLDL-VVS-RHLARLDEPQFQQQQQQQHPSPGPASDGRGAGVSPLR--SAR  
OTU2m\_Chlamydomonas\_schloesseri ---PQLAERLDL-VVS-RHLAQLDEPQFQQQQQQQPGSSP-AAGDARGAGLSPLR--SAR  
OTU2m\_Edaphochlamys\_debaryana ---PPLGARLEA-AFA-AHLRTLDEPPAASAT---TAAA--APAAGSAGGATSPR--TPR  
OTU2\_Volvox\_carteri AV-LPNRSRLHELRLLE-HLVGRYVRKLEALQDVGGVPQG--GGDEGAGGGRSRSR--AAT  
OTU2\_Gonium\_pectorale ---PSAPYSLPGDSLPG-SGARREAVRPE-----PAP---GAASAASGSRSAAR-----  
OTU2\_Chromochloris\_zofingiensis ---LTLYARLRA-SIE-HTWLEMRHAM-----  
OTU2\_Raphidocelis\_subcapitata ---VELHARLLQRVQEAWLARTRLP-----  
OTU2\_Ulva\_mutabilis RF-KLKSCTVAA-QTW-VWKAQALDIP-----  
OTUB1\_Homo\_sapiens ---SKEL-RFKA-VSA-KSKEDLVSQG-----  
OTUB1\_Mus\_musculus ---SKELQRFKA-VSA-KSKEDLVSQG-----  
OTUB\_Drosophila\_melanogaster ---TSAY-EFKK-LAE-ESKEKLVQLG-----  
OTUB\_Caenorhaptiditis\_elegans ---RARLEKFIA-SSR-DWTRTLVELG-----  
OTUB\_Nematostella\_vectensis ---EKEYQRFKD-LAA-RSKDELVELN-----  
OTUB2\_Homo\_sapiens ---SREI-KFKE-RVL-QTPNDLLAAG-----  
OTUB2\_Mus\_musculus ---SREI-KFKE-RVL-QTPNDLLAAG-----  
OTUB\_Monosiga\_brevicolis ---KDAIDGFL-RLR-ETYEMALAAG-----  
OTU1\_Arabidopsis\_thaliana ---RAEVDRIKV-NVE-KCRKTLQNLG-----  
OTU1\_Medicago\_trunculata ---SAEIDRIKA-NVE-RSRKALQTLG-----  
OTU1\_Oryza\_sativa ---KAEVERILK-KIE-QCKKTLADLG-----  
OTU1La\_O.sativa\_55840 ---DLEVSRIGE-RIG-KYKQAYARFG-----  
OTU1Lb\_O.sativa\_30974 ---TREDRLLA-AVR-ALATKAENLQ-----  
OTU1Lc\_O.sativa\_32190 ---TDEENRLLA-AVG-AIDHRQ-----  
OTU1\_Marchantia\_polymorpha ---ETEVKRIQK-NIE-QSKKALIELG-----  
OTU1\_Physcomitrella\_patens\_181928 ---VAEVARMEK-AIE-ICKKTLIDHG-----  
OTU1\_Klebsormidium\_flaccidum ---KTELPRMRD-RIE-RCKQELIAIG-----  
OTU1\_Haematococcus\_pluvialis ---TQETKRLAE-VLQ-GWRSKLVEAG-----  
OTU1\_Chlamydomonas\_reinhardtii ---LAEANRFMS-VVQ-SWKAKLVEGG-----  
OTU1\_Gonium\_pectorale ---LTECDRIKS-VIQ-EWKGKLVDDG-----  
OTU1\_Volvox\_carteri ---LPECSRFSMS-VVQ-AWKTRLVEGG-----  
OTU1\_Chlamydomonas\_eustigma ---IPECRRFIE-CIN-GWRQKLVEAH-----  
OTU1\_Chromochloris\_zofingiensis ---EQQCQRFSN-CVG-GWRQKLIDAG-----  
OTU1\_Raphidocelis\_subcapitata ---DSECQNFLR-TLE-ACKDRMVGAG-----  
OTU1\_Scenedesmus\_obliquus ---EQECQRFTK-CLQ-GWKQKIQDIG-----  
OTU1\_Ulva\_mutabilis ---VEATQAML-MLM-PLRQMLLDAG-----  
OTU1\_Caulerpa\_lentillifera ---QQNQLRMKD-HME-TCKKKLLDAG-----  
OTU1\_Cocomyxa\_subellipsoidea ---LSERNRVVT-CIR-QWKAKLVGVG-----  
OTU1\_Thalassiosira\_pseudonana ---DGEFERIKQ-LVS-DSLLWVCKFG-----  
OTU1\_Phaeodactylum\_tricornutum ---EKDSEKIID-WLKTWSWESVLAAG-----  
OTU1\_Phytophthora\_sojae GG-AALRGRIQH-KIQ-QSKSELVAIG-----  
OTU1\_Trypanosoma\_brucei RA-GAHLERITD----LSRQVVAD-----  
OTU1\_Laccaria\_bicolor P--DFAVASSVS-ALA-ATRDSLKAG-----  
OTU1\_Aspergillus\_nigra ---LMQVRHELA-RIK-SMNALLDQGT-----  
OTU1\_Neurospora\_crassa ---KAQVDGERE-RLE-SLNEYIQHHG-----  
YOD1\_Homo\_sapiens -----  
OTU1\_Saccharomyces\_cerevisiae -----  
OTUD6B\_Homo\_sapiens -----  
OTU2\_Saccharomyces\_cerevisiae -----  
OTUD5\_Homo\_sapiens -----  
OTUD3\_Homo\_sapiens -----

**b (3/8)**

|                                   |                                                              |
|-----------------------------------|--------------------------------------------------------------|
| OTU2p_Chlamydomonas_reinhardtii   | GDPAFAPMHASPGQPAAAAAAGAQQVPPRDDPAAYRGGQRLRLRLRTAWFKCPDA----- |
| OTU2m_Chlamydomonas_reinhardtii   | GDPAVAPMPASPGQPAAAAAAGAQQVPPRDDPAAYRGGQRLRLRLRTAWFKCPDA----- |
| OTU2m_Chlamydomonas_incerta       | GDPAGTLAPASPGQPGEGAAA--AHIPPRDDPAAYRGGQRLRLRLRTAWFKCPDA----- |
| OTU2m_Chlamydomonas_schloesseri   | GDTVGS-TPASPSRRESTAA--AQVPPRDDPAAYRGGQRLRLRLRTAWFKCPDA-----  |
| OTU2m_Edaphochlamys_debaryana     | T-----SPRAAGNGGTASAD--GPLPPSQDAAAYNGRLLRLRLRRRAWFKAPDA-----  |
| OTU2_Volvox_carteri               | PE-----RGGRSDSGGGGGGG--GGGGRSVDQVALRGGKRLRLRLRTAWFKAPDA----- |
| OTU2_Gonium_pectorale             | -----PSSSSSATRLRQRSEPDAGARAAVPRGPD-----                      |
| OTU2_Chromochloris_zofingiensis   | -----QVDADTERGFNVLANFLSRTWYVPAAQHADSR-----                   |
| OTU2_Raphidocelis_subcapitata     | -----NPEVERGALLTRLLARVWYAPGAAGSVEAAAA-----                   |
| OTU2_Ulva_mutabilis               | -----GHASFKARSDKLLKGYVKFRELKQDQVERA-----                     |
| OTUB1_Homo_sapiens                | -----FTEFTIEDFHNTFMDLIEQVE-----                              |
| OTUB1_Mus_musculus                | -----FTEFTIEDFHNTFMDLIEQVE-----                              |
| OTUB_Drosophila_melanogaster      | -----FPSFTLEDFHETFMVILQVRVSPDNAG-----                        |
| OTUB_Caenorhaptiditis_elegans     | -----FPDWTCTDFCFFIEFLEKIH-----                               |
| OTUB_Nematostella_vectensis       | -----FPAFTIEDFHEVFMEVLDMMG-----                              |
| OTUB2_Homo_sapiens                | -----FEEHKFRNFFNAFYSVVELVE-----                              |
| OTUB2_Mus_musculus                | -----FEEHKFRNFFNAFYSVVELVE-----                              |
| OTUB_Monosiga_brevicollis         | -----CPEFTTEDFYETVADMVTDLK-----                              |
| OTU1_Arabidopsis_thaliana         | -----YTDFTFEDFFALFLEQLDDIILQGT-----                          |
| OTU1_Medicago_tranculata          | -----YALTFEDFFTLFLEQLLEDVIGK-----                            |
| OTU1_Oryza_sativa                 | -----YIEFTFEDFFSIFIDQLESVLQGH-----                           |
| OTU1La_O.sativa_55840             | -----SFGIPQEEFLKAFEQLINLI-----                               |
| OTU1Lb_O.sativa_30974             | -----WASE-FSQKHKAFAERLEKIKGWKRMQEH---                        |
| OTU1Lc_O.sativa_32190             | -----WASG-FSQSHKVFELIQNVMRWKRKQKVA-                          |
| OTU1_Marchantia_polymorpha        | -----YQEFTFEDFLSIFVEQLDSVLPGR-----                           |
| OTU1_Physcomitrella_patens_181928 | -----FAEFTFEDFLAIFVEQLQSVIQDK-----                           |
| OTU1_Klebsormidium_flacidum       | -----YTPTFEDFLEIFMDQLESVLPPE-----                            |
| OTU1_Haematococcus_pluvialis      | -----FQDLVFSDALDILLEQLNSIS-----                              |
| OTU1_Chlamydomonas_reinhardtii    | -----FQELVFEDAMELLELQVKEVTKA-----                            |
| OTU1_Gonium_pectorale             | -----FQALVFEDAMDVLLEQVAEISKP-----                            |
| OTU1_Volvox_carteri               | -----FQELVFEDAMDVLLDQVKEITKP-----                            |
| OTU1_Chlamydomonas_eustigma       | -----FQELVFEDAMELLELQVSTIGNN-----                            |
| OTU1_Chromochloris_zofingiensis   | -----FQELVFEDAMDILQNMVNSISLGPQV-----                         |
| OTU1_Raphidocelis_subcapitata     | -----FDPLVFEDALDMLAGMVNAICVGASVP-----                        |
| OTU1_Scenedesmus_obliquus         | -----YDSIVFEDPLDMLLQQVQAILIGPGV-----                         |
| OTU1_Ulva_mutabilis               | -----FMELVFHAMEVLEDDLKAVANT-----                             |
| OTU1_Caulerpa_lentillifera        | -----FQELVFEDALAILQQRVEQIGT-----                             |
| OTU1_Cocomyxa_subellipsoidea      | -----FQEMVFEDAMEIVIDQLNSLGT-----                             |
| OTU1_Thalassiosira_pseudonana     | -----YDEITVDMFYELVDLLEFIESH-----                             |
| OTU1_Phaeodactylum_tricornutum    | -----YDEVMLEAFHDTIVELLERILA-----                             |
| OTU1_Phytophthora_sojae           | -----YSDVAIDAFWETFVDYLAAME-----                              |
| OTU1_Trypanosoma_brucei           | -----YGNF-AEDFCHPAVEMAKKIES-----                             |
| OTU1_Laccaria_bicolor             | -----IDKIVYEDIYDEFVGLISTIVQPNSA-----                         |
| OTU1_Aspergillus_nigra            | -----QQEHLYEIFVDATEDVFIQIATAIQ-----                          |
| OTU1_Neurospora_crassa            | -----GFDPMVFVDVFEETDELLKRISDKLN-----                         |
| YOD1_Homo_sapiens                 | -----                                                        |
| OTU1_Saccharomyces_cerevisiae     | -----                                                        |
| OTUD6B_Homo_sapiens               | -----                                                        |
| OTU2_Saccharomyces_cerevisiae     | -----                                                        |
| OTUD5_Homo_sapiens                | -----                                                        |
| OTUD3_Homo_sapiens                | -----                                                        |

b (4/8)

OTU2p\_Chlamydomonas\_reinhardtii -----PRPSDVSSLERLFNSVEQSGEVIRFARSLTARELMAAEFFYTPFIPGCG  
OTU2m\_Chlamydomonas\_reinhardtii -----PRPSDVTSLERLFNSAEQSGEVIRFARSLTARELMAAEFFYTPFIPGCG  
OTU2m\_Chlamydomonas\_incerta -----PRPSDVSSLERLFNSAEQSGEVIRFARSLTARELMAAEFFYTPFIPGCG  
OTU2m\_Chlamydomonas\_schloesseri -----PRPSDVSSLERLLNSAEQSGEVIRFARSLTARELMAAEFFYTPFIPGCG  
OTU2m\_Edaphochlamys\_debaryana -----PAPTDLASLEALLNAPGDSGDVIRFARSLTVRELLRAEDFYAPFIPGCG  
OTU2\_Volvox\_carteri -----PEPSDVP SRKRLFNSSAASSEVIRFARSLTVYELVSDAEFYAPFIPGCG  
OTU2\_Gonium\_pectorale -----DPSDDLSSLERLLNSGSASAEVIRFARSLTVAELMAGEEFYAPYIPGCG  
OTU2\_Chromochloris\_zofingiensis LPAAAQQEEG-NGPLYLPELEAALSSRDIFDPLVKFARSATSWEKLSNEQMYAPFIAGCC  
OTU2\_Raphidocelis\_subcapitata ARAGAGASTG-AGPLFLPELEAALACRDAFDPLVAFARAATSLELRANEAYAPFLAGCG  
OTU2\_Ulva\_mutabilis -----GENVDPMPLVLEFFQGVMGNSVMHLIRQLAAYEMLAHEDQYATFLPAIE  
OTUB1\_Homo\_sapiens -----KQTSVADLLASFNDQSTSDYLVVYLRLLTSGYLQRESKFFEHFIEGG-  
OTUB1\_Mus\_musculus -----KQTSVADLLASFNDQSTSDYLVVYLRLLTSGYLQRESKFFEHFIEGG-  
OTUB\_Drosophila\_melanogaster -----GHSTVQDELHKIFNEQGYSDYVVYLRLLTSGKLEQEEADFYQNFIEGD-  
OTUB\_Caenorhaptiditis\_elegans -----SGVHTEAVYTI LNDDGSANYILMFRLITSAFLKQNSEEYAPFIDEG-  
OTUB\_Nematostella\_vectensis -----NNATEDQLIQKFQDEGISNYLVVYLRLLTSAQLQRNAVFFENFIEGE-  
OTUB2\_Homo\_sapiens -----KDGSVSLLKVFNDQSASDHIVQFLRLLTSAFIRNRADFFRHFIDE-  
OTUB2\_Mus\_musculus -----KDSSVSSLLKVFNDQSSSDRIVQFLRLLTSAFIRNRADFFRHFIDE-  
OTUB\_Monosiga\_brevicollis -----ADEASLTTLAAVNDEGLSNYLVAVMRIITSAYMQLNADYFQPFIEGG-  
OTU1\_Arabidopsis\_thaliana -----EESISYDELVNRSRDQSVSDYIVMFFRFVTSAGDIRTRADFFPFITGLS  
OTU1\_Medicago\_trunculata -----ETSISHEELVLRSDQSVSDYVMMFFRFVTSAEIQKRSEFFPFIMGLT  
OTU1\_Oryza\_sativa -----ESSIGAEELLETRDQMVSDYVMMFFRFVTSGEIQRAEFPFISGLT  
OTU1La\_O.sativa\_55840 -----EKGVAVEQLYQ-IDETDITKNSLRFRLFLTEIEICTHEDHYKGFLLTAD  
OTU1Lb\_O.sativa\_30974 -----PISIIIRKILEFFSSYDITDDIFAFRLVAATWCTRIWNYEWCATNCG  
OTU1Lc\_O.sativa\_32190 -----SADSRKQLEFFSSYSKSDGILAFKLYAAANWICSHREEYEPNIAGLG  
OTU1\_Marchantia\_polymorpha -----ESSVDIDQLVEKCRDRYISDYVMMFFRFVTSAEIRKRAEFPFISGLS  
OTU1\_Physcomitrella\_patens\_181928 -----EVSVSLETLVERCRDQYISNSVMMFFRFVTSGEIGRRTEFFPFIQGMS  
OTU1\_Klebsormidium\_flaccidum -----GQPI SLSELEVRCDPNSVNWAVMFFRFVTSAEVQRRAEFPFIFILGLT  
OTU1\_Haematococcus\_pluvialis -----QGFLSSEALQEAYQDDTASNLVIMLLRFIVSAEIKRRDFFLFPILGMY  
OTU1\_Chlamydomonas\_reinhardtii -----SDQFAQEKLNVNMRDDMVSNMIVMFLRLVTSCEVQRREDFPFILGMY  
OTU1\_Gonium\_pectorale -----YTNFAHDKLLVDMRDTISNLIVMLLRLLTSCVQRREDFPFILGMY  
OTU1\_Volvox\_carteri -----YTNMHERLLVNMRRDTSVSNLVMLLRLLTSCVQRREDFPFIFIMGY  
OTU1\_Chlamydomonas\_eustigma -----DNPMTKETLTINMRDDMVSNMVMFLRMVTSAEIQRRSDFPFIFIMGY  
OTU1\_Chromochloris\_zofingiensis -----PDHMTQEQLENNFRDMLSNVVMFLRMVTSAEIQRRQDFLFPFIWGMT  
OTU1\_Raphidocelis\_subcapitata -----GQGADASTLLANFRDDTVSNMVMMLLRFITSAEIQARQDHFAPFVLGVA  
OTU1\_Scenedesmus\_obliquus -----EGGIDEQQLANFRDDTWSNTCVMLLRFITSAEIKRRVDHFEFPVVGQY  
OTU1\_Ulva\_mutabilis -----EDRMEPGELLVRLNDEVCNMLVMLVRFVSAHVSRAEHFLPFILGMV  
OTU1\_Caulerpa\_lentillifera -----ELTLEEWELVMN--DDNMSNYIVMFLRLLTSAEIQLRREFFPFIFIGIS  
OTU1\_Coccomyxa\_subellipsoidea -----AEPLSVQLEDNFCDAMLSPMIIMLLRMLTSAEIQRRSDFPFIFIMGMC  
OTU1\_Thalassiosira\_pseudonana -----ASSQLHSKLNE---ENATSDYCTWFMVRMTAAQMKSNPDRYLPFLFGGM  
OTU1\_Phaeodactylum\_tricornutum -----GTLDEAAFHEEMNQETATS DYCTWYLRVVTATHLQDPGRFLPFIAEPG  
OTU1\_Phytophthora\_sojae -----TRTHAELVQDFQTEGGESEYLVWYMRLLTAGYMKQHAETFQPFIDGLY  
OTU1\_Trypanosoma\_brucei -----GECSTVEQLYELS-TNGEAEYALYFYRYAVSHHIRTTHEDDFLFPVVGMG  
OTU1\_Laccaria\_bicolor -----GKKLDSAGLLAFQSPMSNAVVMRFLTSAEIRVHRENYEAFLIHPE  
OTU1\_Aspergillus\_nigra -----SGIRDETFLVDAFNEEYNSNAIITHFRLLTSAWMKLHPAQYEAFLSM--  
OTU1\_Neurospora\_crassa -----VPEEAMSEVMHAFTDAEKSNAI IYHLRLLASSWLKENRGSHEAFITTD-  
YOD1\_Homo\_sapiens -----ACAPEMRRLIAQIVASDPDFYSEAILG--  
OTU1\_Saccharomyces\_cerevisiae -----DSVRDLREMVSKVLLNPNVVFNDAILD--  
OTUD6B\_Homo\_sapiens -----LTVVALRSQTAEYMQSHVEDFLPFLTNP  
OTU2\_Saccharomyces\_cerevisiae -----KKLDQDMVMKLRWLSKNYVQEHRRDFIPLYFDEE  
OTUD5\_Homo\_sapiens -----DMHEVVRKHCDYLMKNADYFSNYVTE--  
OTUD3\_Homo\_sapiens -----RNHLKHRQETVDYMIKQREDFPFVDED-

**b (5/8)**

OTU2p\_Chlamydomonas\_reinhardtii GDYTGTLTLRQICERHVLPMGVEVEQLQIIAACTALGVTTLAVLDVAGSAV-----  
OTU2m\_Chlamydomonas\_reinhardtii GDYTGTLTLRQICERHVLPMGVEVEQLQIIAACTALGVTTLAVLDVAGSAV-----  
OTU2m\_Chlamydomonas\_incerta GDYAGLSLRQICERHVLPMGVEVEQLQIIAACTALGVTTLAVLDVAGSAV-----  
OTU2m\_Chlamydomonas\_schloesseri GDYTGLSLRQICERHVLPMGVEVEQLQIIAACTALGVTTLAVLDVAGSAV-----  
OTU2m\_Edaphochlamys\_debaryana RDYTGLSLRQICAHVLPPLGVEVEQLQMIALCTALGAVVAVLDVAGSQV-----  
OTU2\_Volvox\_carteri MDYSGMSLQWICSHHVLPMGVEVEQLQIIALCRALGITLGLVDVAGSQV-----  
OTU2\_Gonium\_pectorale GDYSGLSLRQVCVRHVLPMGVEVEQLQINALCSALGAPVAVLDVAGSQV-----  
OTU2\_Chromochloris\_zofingiensis QEY TALNIQQICERYVERMQEVEQLQMVVALAHAMKVAVGILDVAGSEI-----  
OTU2\_Raphidocelis\_subcapitata PGYGAASMAELCSRVERMGEEVEQVQMAALASAVAVSVGLDVAGSEV-----  
OTU2\_Ulva\_mutabilis GPYEQLTVPLVVGRLVAVDGVAAEHVMIQAIATLLGLCLAVVYADGQA-----  
OTUB1\_Homo\_sapiens -----RTVKEFCQQEVEPMCKESDHIHI IALAQALS SVSIQVEYMDRGE--  
OTUB1\_Mus\_musculus -----RTVKEFCQQEVEPMCKESDHIHI IALAQALS SVSIQVEYMDRGE--  
OTUB\_Drosophila\_melanogaster -----LTIEAFRHLVEPEMCKESDHIHI IALCTALGAGVRVEYLDREGG-----  
OTUB\_Caenorhaptiditis\_elegans -----MTVQYCEQEIEPMWKDADHLAINSLIKAAGTRVRIEYMDRTAAP-----  
OTUB\_Nematostella\_vectensis -----RTVKEFCNQEVEPMCKESDHIHI IGLTEALGVCIRVEYVDRGTG-----  
OTUB2\_Homo\_sapiens -----MDIKDFCTHEVEPMATECDHIQITALSQALSIALQVEYVDEM-----  
OTUB2\_Mus\_musculus -----MDIKDFCTHEVEPMAMECDHVQITALSQALNIALQVEYVDEM-----  
OTUB\_Monosiga\_brevicollis -----LTVKEYCSISVDPFGVESEHLQAQALISALRLGCRITYIDRSPGA-----  
OTU1\_Arabidopsis\_thaliana N----ATVDQFCKSSVEPMGEEEDHIHITALS DALGVAIRVVYLD RSSCDSGGV-----  
OTU1\_Medicago\_truncatula N----TTVEQFCKASVEPMGEEEDHVHITALS DALGPIRIRVVYLD RSSC DTGGV-----  
OTU1\_Oryza\_sativa N----STVVQFCKASVEPMGEEEDHVHI IALS DALGVP IRVMYLD RSSC DAGNI-----  
OTU1La\_O.sativa\_55840 Y----SSVFEFCQVEVRPENAEASNEQMKALVEALGIPVLVENLDTTSETDTP-----  
OTU1Lb\_O.sativa\_30974 EN----QNLEDWCSKHVIAPRVYATSAAVKACAEALRVTVQVENVDHGT-----  
OTU1Lc\_O.sativa\_32190 GG---YTLEAWCEIYLLQPREQTDHIQMTAVAAAALGVPLRVENLHNGP-----  
OTU1\_Marchantia\_polymorpha N----MNVQFCKTSVEPMGEEEDHVHITALS DALGVPVVRVVYLD RSVGADGKNT-----  
OTU1\_Physcomitrella\_patens\_181928 N----MSVQFRSSVEPMGEEEDHVHITALS DALGVPVVRVVYLD QSGDVNDKPV-----  
OTU1\_Klebsormidium\_flaccidum N----LDVKKFCQTSVEPMGEEEDHVHITAL TDALGPIRIRVVYLD RSGGASDDAL-----  
OTU1\_Haematococcus\_pluvialis DDPP--ACVDTFCQRVPEMAEESDNIHIVAL TDALQVPVTVVYLD RSGVESRASHLATRT  
OTU1\_Chlamydomonas\_reinhardtii DEPP--ATVELFCQRHVEPMGEEEDHLHIVAVTEALQIPVVRVVYLDSSGLPAGGGGGGAGA  
OTU1\_Gonium\_pectorale DEPP--ATVELFCQRHVEPMGEEEDHLHIVAITDALQIPVVRVVYLDSSGLPTGGGSGL--  
OTU1\_Volvox\_carteri DEPP--ATVELFCQRHVEPMGEEEDHLHIVAITDALQIPVVRVVYLDSSGMPTGGNGSGL--  
OTU1\_Chlamydomonas\_eustigma DDV--SCVEVFCQRSVEPMGEEEDHVHIVALSDALQVPIAVVYLD RSNVNRVNEGSSEV--  
OTU1\_Chromochloris\_zofingiensis EDES--MTADVFCRKFVEPMGEESEHIIHAQVLTDAFQVAVRVMYLD SRDHGTDN-----  
OTU1\_Raphidocelis\_subcapitata D----TDVQTFCCRFRVPEMAEESDHVHAQALCDALRVPI TVVYLD SHERSGVGGGAGGST  
OTU1\_Scenedesmus\_obliquus D----MDVATFCERSVDVPMGEEEDHIHAQALTD AVQVPVRI IQIDSSGGQ-----  
OTU1\_Ulva\_mutabilis DGC--DGVDDFRRHVEAMGEEEDHIQVVAVTEAFQVPLVVYLDNSSVTADGNGNGNGN  
OTU1\_Caulerpa\_lentillifera DV---LDVELFCQRMVEMDEESDEIHIRALTDAL EIPTRVYSLDSQPPI-----  
OTU1\_Cocomyxa\_subellipsoidea DDE--VSVEQFCRRYVEPMGEEEDHVHIVALTNALLVPIRIVVYLD RSMGAAMAGVGYDSA  
OTU1\_Thalassiosira\_pseudonana -----IDIPTFCTREVEPMNKECGMVQAALAEFCFVVRVAIEYMDGRR-----  
OTU1\_Phaeodactylum\_tricornutum -----LGINDFCQREVEPMGKECEQVQLALAEAFGVQVTIAYLDGHELLYG-----  
OTU1\_Phytophthora\_sojae PG---QTVAQFCAAEVEPMGKECDQPQIAALTEALQVGVKIEYLDGSAGPGQ-----  
OTU1\_Trypanosoma\_brucei H----ETVSEFCSEVD AVASEADNVQVFAQCFDVRVIVEYVDGREGD-----  
OTU1\_Laccaria\_bicolor THEP--MGVDAFCANIVEPLGKEADHVEIQALCAALQLNVDVAYLNGGSEE-----  
OTU1\_AspERGILLUS\_nigra -----PVEQYCATRIDVVRTEIDEIQLQALVDG VGF AVEIMYLD RSEGE-----  
OTU1\_Neurospora\_crassa -----ESVEKFCQRVIEVFNIEIDQLGLQALVSI LGFVLRVAYLDRSPGS-----  
YOD1\_Homo\_sapiens -----KTNQEYCDW- IKRDDTWGGAIEI S ILSKFYQCEICVVD TQTVR-----  
OTU1\_Saccharomyces\_cerevisiae -----KPNKDYAQW- I LKME SWGGAIEI G IISDALAVAIYVVDIDAVK-----  
OTUD6B\_Homo\_sapiens TGYTPPEEFQKYCED- IVNTAAWGGQLELRALSHILQTPIEI IQADSP-----  
OTU2\_Saccharomyces\_cerevisiae TMKM--KDI DEYTK E-MEHTAQWGG EIEI LALSHVFD C PISILMSGR-----  
OTUD5\_Homo\_sapiens -----DFTTYINR- KRKN NCHGNHIE MQAMAEMYNRPVEVYQYSTEP-----  
OTUD3\_Homo\_sapiens -----IPFEKHVAS- LAKPGTFAGND AIVAFARNHQLN VVIHQLNAPLW-----



**b (6/8)**

|                                   |                                                            |
|-----------------------------------|------------------------------------------------------------|
| OTU2p_Chlamydomonas_reinhardtii   | GAIKHG--PAA-----                                           |
| OTU2m_Chlamydomonas_reinhardtii   | GAIKHG--PAA-----                                           |
| OTU2m_Chlamydomonas_incerta       | GAIKHG--PAA-----                                           |
| OTU2m_Chlamydomonas_schloesseri   | GAIKHG--PAA-----                                           |
| OTU2m_Edaphochlamys_debaryana     | GAIKHG--PPG-----                                           |
| OTU2_Volvox_carteri               | GAIKHG--PTG-----                                           |
| OTU2_Gonium_pectorale             | GAIKHG--PPG-----                                           |
| OTU2_Chromochloris_zofingiensis   | GYIQH---PAG-----                                           |
| OTU2_Raphidocelis_subcapitata     | GMVRH---PAG-----                                           |
| OTU2_Ulva_mutabilis               | DPKVHISSQR-----                                            |
| OTUB1_Homo_sapiens                | TTNPHIF-PEG-----                                           |
| OTUB1_Mus_musculus                | TTNPHVF-PEG-----                                           |
| OTUB_Drosophila_melanogaster      | TVKAHDF-PEG-----                                           |
| OTUB_Caenorhabditis_elegans       | NGGWHYDIPSD-----                                           |
| OTUB_Nematostella_vectensis       | DVNHHDF-PED-----                                           |
| OTUB2_Homo_sapiens                | ALNHHVF-PEA-----                                           |
| OTUB2_Mus_musculus                | ALNHHVF-PEA-----                                           |
| OTUB_Monosiga_brevicolis          | EPPCHVLEGPD-----                                           |
| OTU1_Arabidopsis_thaliana         | TVNHHDFVPVG-----                                           |
| OTU1_Medicago_trunculata          | SVNHHDFTPVA-----                                           |
| OTU1_Oryza_sativa                 | SVNHHDFSPEA-----                                           |
| OTU1La_O.sativa_55840             | ILNQHFYPRPESEEGTMLGPLNSHEIVSPESGGYHAARGELQNPSTSGSSTNSSTEAL |
| OTU1Lb_O.sativa_30974             | CESTHYIVRGA-----                                           |
| OTU1Lc_O.sativa_32190             | AQDIYTADGVN-----                                           |
| OTU1_Marchantia_polymorpha        | DVNHHDFLPPD-----                                           |
| OTU1_Physcomitrella_patens_181928 | IVNNHDFIPEG-----                                           |
| OTU1_Klebsormidium_flaccidum      | EINHDFVPES-----                                            |
| OTU1_Haematococcus_pluvialis      | EVNEHTIVPDA-----                                           |
| OTU1_Chlamydomonas_reinhardtii    | EASCHDFVPDS-----                                           |
| OTU1_Gonium_pectorale             | DATVHDFVPDS-----                                           |
| OTU1_Volvox_carteri               | DATMHDFVPDS-----                                           |
| OTU1_Chlamydomonas_eustigma       | EVETYHFNPEP-----                                           |
| OTU1_Chromochloris_zofingiensis   | SVSKVDFIPEG-----                                           |
| OTU1_Raphidocelis_subcapitata     | ECEVHRFEPDS-----                                           |
| OTU1_Scenedesmus_obliquus         | EASVDMKPEG-----                                            |
| OTU1_Ulva_mutabilis               | QCNTHVFEPRE-----                                           |
| OTU1_Caulerpa_lentillifera        | EIQPTDYVPEE-----                                           |
| OTU1_Cocomyxa_subellipsoidea      | AVNHHDFVPDS-----                                           |
| OTU1_Thalassiosira_pseudonana     | -VATHVFGese-----                                           |
| OTU1_Phaeodactylum_tricornutum    | RLAQHTFGPDS-----                                           |
| OTU1_Phytophthora_sojae           | DLQSYVCSPTV-----                                           |
| OTU1_Trypanosoma_brucei           | CTTRHTFQQKD-----                                           |
| OTU1_Laccaria_bicolor             | GVVDFIPFRIA-----                                           |
| OTU1_Aspergillus_nigra            | AVTPHLL-TPP-----                                           |
| OTU1_Neurospora_crassa            | EVNTYSF-PEE-----                                           |
| YOD1_Homo_sapiens                 | -IDRFGE-DAG-----                                           |
| OTU1_Saccharomyces_cerevisiae     | -IEKFNE-DKF-----                                           |
| OTUD6B_Homo_sapiens               | -IIVGEE-YSK-----                                           |
| OTU2_Saccharomyces_cerevisiae     | -IQVYNE-CGK-----                                           |
| OTUD5_Homo_sapiens                | -INTFHG-IHN-----                                           |
| OTUD3_Homo_sapiens                | -QIRGTE-KSS-----                                           |

**b (7/8)**

OTU2p\_Chlamydomonas\_reinhardtii -----QQHGPPVAWVAHL-----PGHYDVIYPARPLDV  
OTU2m\_Chlamydomonas\_reinhardtii -----QQHGPPVAWVAHL-----PGHYDVIYPARPLDV  
OTU2m\_Chlamydomonas\_incerta -----QQHGPPVAWVAHL-----PGHYDVIYPARALDV  
OTU2m\_Chlamydomonas\_schloesseri -----QQHSPPVAWVAHL-----PGHYDVIYPARPLDV  
OTU2m\_Edaphochlamys\_debaryana -----PAAAQPPAAWVAHL-----PGHYDVIYPARRMDV  
OTU2\_Volvox\_carteri -----HLGPPVAWVAHL-----PGHYDVVYPAKQLDV  
OTU2\_Gonium\_pectorale -----ARGPPAAWVAHL-----PGHYDVIYPARPLDV  
OTU2\_Chromochloris\_zofingiensis -----DATLAFWMIHL-----PGHYEIVYARPLDV  
OTU2\_Raphidocelis\_subcapitata -----GGEPLFYLVHL-----PGHYEICYS-----  
OTU2\_Ulva\_mutabilis -----EHVEEGEPSMFLFR-----DGHYDLIYPINNSWR  
OTUB1\_Homo\_sapiens -----SEPKVYLLYR-----PGHYDILYK-----  
OTUB1\_Mus\_musculus -----SEPKVYLLYR-----PGHYDILYK-----  
OTUB\_Drosophila\_melanogaster -----SEPRIYLIYR-----PGHYDILYPN-----  
OTUB\_Caenorhapditiis\_elegans -----DQQIAPETLLYR-----PGHYDVIYKKDSTEA  
OTUB\_Nematostella\_vectensis -----GSTPIVHLLYR-----PGHYDILYLANQ---  
OTUB2\_Homo\_sapiens -----ATPSVYLLYK-----TSHYNILYAADKH--  
OTUB2\_Mus\_musculus -----AIPSVYLLYK-----TSHYNILYAAEKH--  
OTUB\_Monosiga\_brevicollis -----GSGQPVCVHLMFR-----PGHYDVIYLPATAA  
OTU1\_Arabidopsis\_thaliana -----ITNEKDEEASAPFITLLYR-----PGHYDILYKPKPCKV  
OTU1\_Medicago\_trunculata -----GDLPSASGSSEKKNPFITLLYR-----PGHYDILYKPK-----  
OTU1\_Oryza\_sativa -----NSSDGA AAAEKPYITLLYR-----PGHYDILYKPK-----  
OTU1La\_O.sativa\_55840 GLQSIGTSSTPNERDGKDRITINDLSPAERRRLAILLYR-----PGHYDILCPK-----  
OTU1Lb\_O.sativa\_30974 -----PCVTLLRI-----ESHYDIYPLPSSSI  
OTU1Lc\_O.sativa\_32190 -----IPRVTLTY-----GVHYDILYPRHPSSG  
OTU1\_Marchantia\_polymorpha -----CPTVEMPPVLLYR-----PGHYDILYTRVQNL  
OTU1\_Physcomitrella\_patens\_181928 -----MDAAVEPNVLLYR-----PGHYDILYRKENSED  
OTU1\_Klebsormidium\_flaccidum -----APESFKPDTSGLLTLLYR-----PGHYDILYSL-----  
OTU1\_Haematococcus\_pluvialis -----CAAAGAPIRVHVLRY-----PGHYDILYKRPE---  
OTU1\_Chlamydomonas\_reinhardtii -----CPPGTAPRVHLLYR-----PGHYDILYAKSG--  
OTU1\_Gonium\_pectorale -----CVPGTHPRVHLLYR-----PGHYDILYAKGG--  
OTU1\_Volvox\_carteri -----CVPGTQPRVHLLYR-----PGHYDILYKPKGG--  
OTU1\_Chlamydomonas\_eustigma -----GASVLRSCVSLLYR-----PGHYDILYQQ-----  
OTU1\_Chromochloris\_zofingiensis -----CTGADAVPHVHVLRY-----PGHYDILYPL-----  
OTU1\_Raphidocelis\_subcapitata -----EGAGSIAAAAAGDGGGGAGTGRGRPSVHLLYR-----PGHYDISYPKLIA--  
OTU1\_Scenedesmus\_obliquus -----LSAEQQAALGPPKVHMLYR-----PGHYDILYPC-----  
OTU1\_Ulva\_mutabilis -----PVAGATIPQVAVLYR-----PGHYDILYK-----  
OTU1\_Caulerpa\_lentillifera -----ASIKSEIIVHLLYR-----PGHYDIYPKTTSTL  
OTU1\_Cocomyxa\_subellipsoidea -----LAESAAPVNRVHVLRY-----PGHYDILYK-----  
OTU1\_Thalassiosira\_pseudonana -----EEGSDEASTLTLTYR-----PGHYDILYQSECRYI  
OTU1\_Phaeodactylum\_tricornutum -----ASIEISLLYR-----PGHYDILYRCR----  
OTU1\_Phytophthora\_sojae -----PATEQQEVPVITLLYR-----PGHYDILYPREAGAE  
OTU1\_Trypanosoma\_brucei -----SHDANEYTTIEVTLLYR-----PGHYDILYK-----  
OTU1\_Laccaria\_bicolor -----SGSESLPLVLLYR-----PGHYDILYKKGQGEQ  
OTU1\_Aspergillus\_nigra -----RPTGGTICLLYR-----PGHYDILYKKGQGEQ  
OTU1\_Neurospora\_crassa -----AISQPTSPLDPVICLLYR-----PDHYDILYKKGQGEQ  
YOD1\_Homo\_sapiens -----YTKRVLLIYD-----GIHYDILYKKGQGEQ  
OTU1\_Saccharomyces\_cerevisiae -----DNYILILFN-----GIHYDSLTMNEFK--  
OTUD6B\_Homo\_sapiens -----KPLILVYMRHAYGLGEHYNSVTRLVNIVT  
OTU2\_Saccharomyces\_cerevisiae -----NPELKLVIYKHSYALGEHYNSLHDS-----  
OTUD5\_Homo\_sapiens -----EDEPIRVSYHR-----NIHYNSVVPNKATI  
OTUD3\_Homo\_sapiens -----VRELHIAYRY-----GEHYDSVRRINDNSE

**b (8/8)**

```
OTU2p_Chlamydomonas_reinhardtii APGGQLVAIII-----
OTU2m_Chlamydomonas_reinhardtii APGGQLVAIII-----
  OTU2m_Chlamydomonas_incerta APGGQLVAIVDM-----
OTU2m_Chlamydomonas_schloesseri APGGQLVPAAKKGIVAT
  OTU2m_Edaphochlamys_debaryana APGGMLVPA-----
    OTU2_Volvox_carteri APGGALVPVLLPEGF--
      OTU2_Gonium_pectorale APGGALIPV-----
OTU2_Chromochloris_zofingiensis STLTTLVKKAG-----
  OTU2_Raphidocelis_subcapitata -----
    OTU2_Ulva_mutabilis CLVAQTGTVSDY-----
      OTUB1_Homo_sapiens -----
        OTUB1_Mus_musculus -----
OTUB_Drosophila_melanogaster -----
  OTUB_Caenorhapditis_elegans SEIEN-----
  OTUB_Nematostella_vectensis -----
    OTUB2_Homo_sapiens -----
      OTUB2_Mus_musculus -----
OTUB_Monosiga_brevicolis -----
  OTU1_Arabidopsis_thaliana SDNVGK-----
  OTU1_Medicago_tranculata -----
    OTU1_Oryza_sativa -----
      OTU1La_O.sativa_55840 -----
      OTU1Lb_O.sativa_30974 NSSNPHEEKLLPIPSSI
      OTU1Lc_O.sativa_32190 SGSKSSTQR-----
    OTU1_Marchantia_polymorpha APVPRVEEPQDL-----
  OTU1_Physcomitrella_patens_181928 ALLSNLEQTG-----
  OTU1_Klebsormidium_flaccidum -----
  OTU1_Haematococcus_pluvialis -----
  OTU1_Chlamydomonas_reinhardtii -----
    OTU1_Gonium_pectorale -----
      OTU1_Volvox_carteri -----
        OTU1_Chlamydomonas_eustigma -----
  OTU1_Chromochloris_zofingiensis -----
  OTU1_Raphidocelis_subcapitata -----
    OTU1_Scenedesmus_obliquus -----
      OTU1_Ulva_mutabilis -----
        OTU1_Caulerpa_lentillifera -----
        OTU1_Cocomyxa_subellipsoidea -----
        OTU1_Thalassiosira_pseudonana R-----
  OTU1_Phaeodactylum_tricornutum -----
    OTU1_Phytophthora_sojae QEKAS-----
    OTU1_Trypanosoma_brucei -----
      OTU1_Laccaria_bicolor ELRH-----
      OTU1_Aspergillus_nigra MEPVVNYQYAMTSDYS-
      OTU1_Neurospora_crassa PAPMNIQVFRATIPQY-
        YOD1_Homo_sapiens TPPLTIFSSND-----
  OTU1_Saccharomyces_cerevisiae ----TVFNKNQP-----
    OTUD6B_Homo_sapiens ENCS-----
  OTU2_Saccharomyces_cerevisiae -----
    OTUD5_Homo_sapiens GVGLGLPSFKPG-----
    OTUD3_Homo_sapiens APAHLQTDFOML-----
```

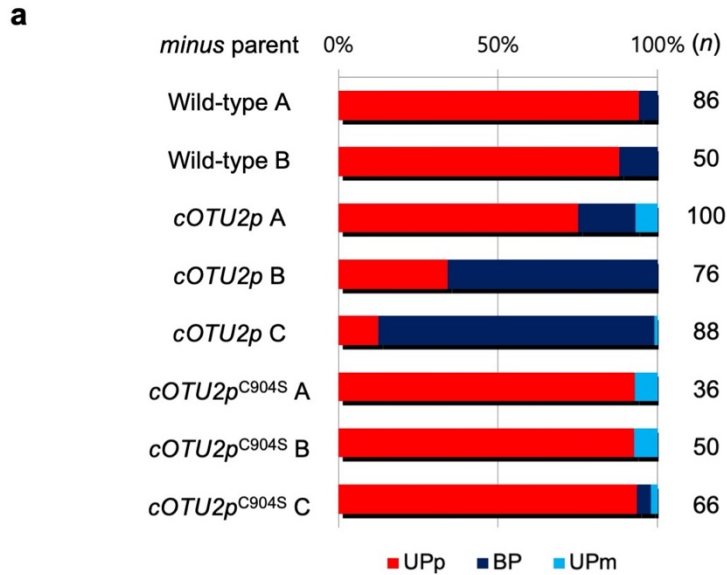

**b**

| plus parent (eryR) | minus parent (specR)       | Total (zygotes) | eryR | Both | specR | Exceptional | P-value   |
|--------------------|----------------------------|-----------------|------|------|-------|-------------|-----------|
| CC-333             | Control-A                  | 86              | 81   | 5    | 0     | 6%          | n.a.      |
|                    | Control-B                  | 50              | 44   | 6    | 0     | 12%         | n.a.      |
|                    | cOTU2p-A                   | 100             | 75   | 18   | 7     | 25%         | 7.77E-10  |
|                    | cOTU2p-B*                  | 76              | 26   | 50   | 0     | 66%         | 4.79E-49  |
|                    | cOTU2p-C*                  | 88              | 11   | 76   | 1     | 88%         | 9.66E-111 |
|                    | cOTU2m-A                   | 106             | 90   | 10   | 6     | 15%         | 5.12E-04  |
|                    | cOTU2m-B                   | 88              | 74   | 13   | 1     | 16%         | 3.31E-06  |
|                    | cOTU2m-C                   | 130             | 108  | 18   | 4     | 17%         | 2.64E-04  |
|                    | cOTU2p <sup>C904S</sup> -A | 36              | 35   | 0    | 1     | 3%          | 8.26E-18  |
|                    | cOTU2p <sup>C904S</sup> -B | 50              | 48   | 0    | 4     | 8%          | 5.88E-13  |
|                    | cOTU2p <sup>C904S</sup> -C | 66              | 63   | 2    | 1     | 5%          | 1.47E-09  |

**Supplementary Figure 10.** DUB activity of Otu2p is required for promoting chloroplast DNA inheritance. Individual zygote progeny from the mating of the erythromycin-resistant (eryR) WT *plus* strain with three independent transgenic *minus* strains that harbor *cOTU2p* or *cOTU2p*<sup>C904S</sup> (the non-catalytic Cys904Ser mutation) in a spectinomycin-resistant parental strain (specR) were examined for antibiotic resistance. (a) The C904S mutation abolished the increase in biparental inheritance caused by *cOTU2p*. (*n*) indicates the number of germinating zygotes examined. (b) Antibiotic resistance data depicted in Supplementary Fig. 10a. Asterisks indicate significant differences from the control mating in the exceptional zygote rate, as estimated with the chi-square test ( $p$ -value < 1.0E-25).



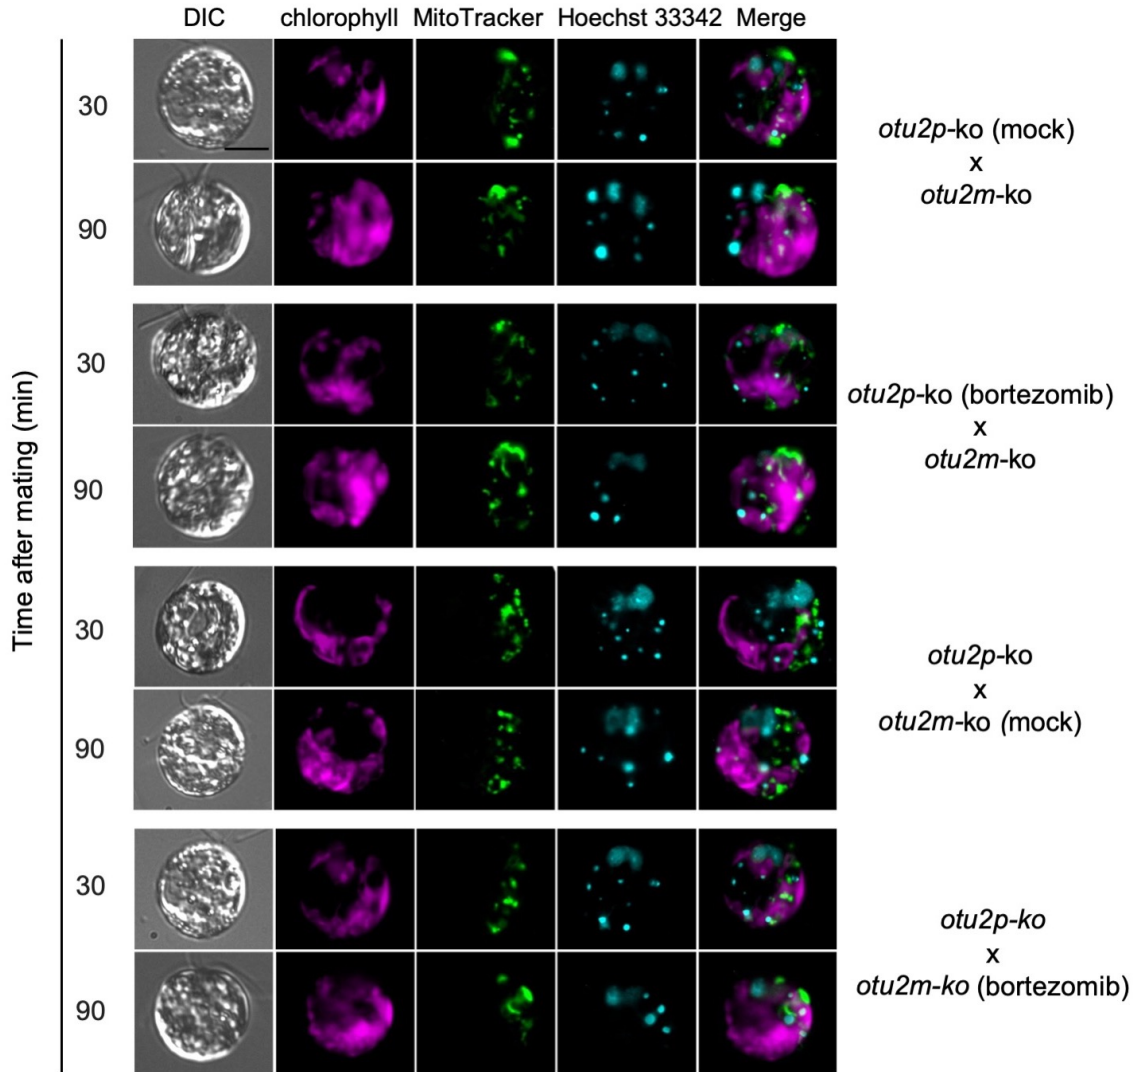

**Supplementary Figure 12.** Bortezomib treatment of *otu2-ko* mutant gametes phenocopied Otu2p expression for cpDNA degradation in zygotes. Differential interference contrast and overlaid fluorescent images of Hoechst 33342 (cyan)-stained zygotes with chlorophyll autofluorescence (magenta) at the indicated times after mating. Experiments were repeated three times. Quantitative results of three biological experiments are provided in Section “Figure 5d” of Supplementary Table 3. Only the *minus* gametes were stained with MitoTracker Green (green), staining *minus* chloroplasts in the zygotes. Bar = 5  $\mu$ m.

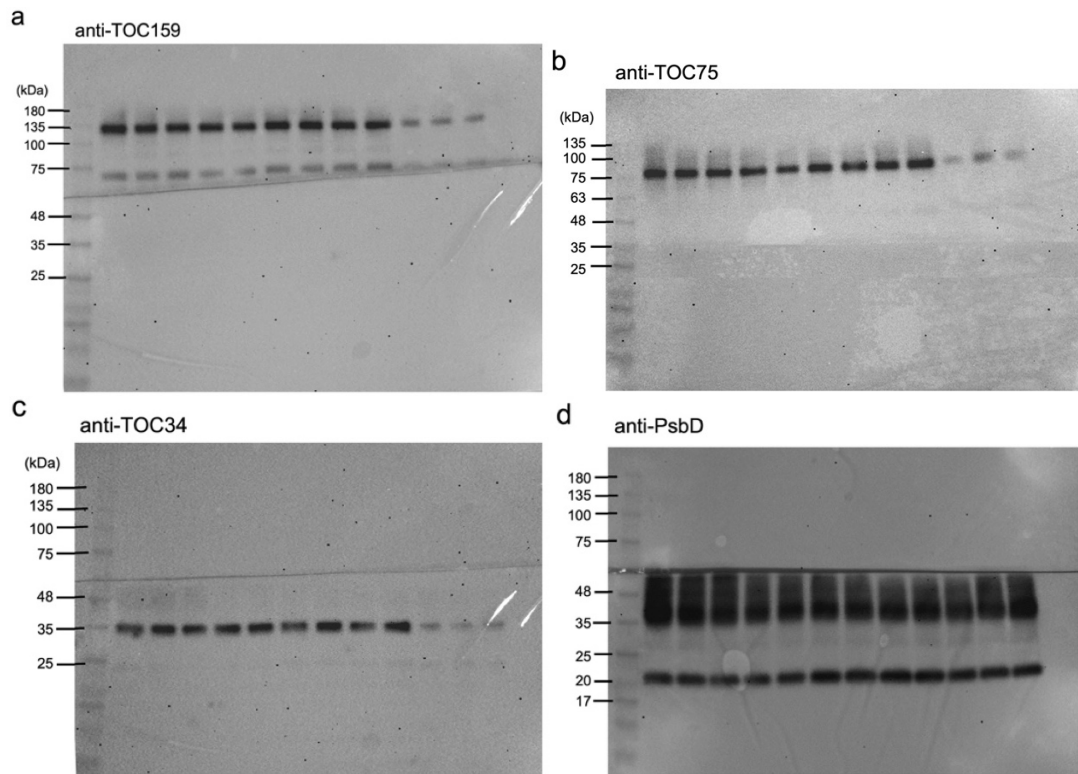

**Supplementary Figure 13.** The complete blots of Fig. 4a. **(a)** anti-TOC159. **(b)** anti-TOC75. **(c)** anti-TOC34. **(d)** anti-PsbD.

**Supplementary Table 1.** Genetic analysis of cpDNA inheritance for testing the “protector” function of *OTU2/EZY2* cluster in *MT+*

| plus parent (specR) | minus parent (eryR) | Total (zygotes) | specR | Both | eryR | Exceptional | P-value  |
|---------------------|---------------------|-----------------|-------|------|------|-------------|----------|
| CJU10-J1            | CC-2663             | 93              | 89    | 2    | 2    | 4%          | n.a.     |
| same as above       | D13-03*             | 43              | 36    | 4    | 3    | 9%          | 2.06E-07 |
|                     | D13-06              | 53              | 52    | 2    | 0    | 4%          | 1.22E-04 |
|                     | D13-08*             | 73              | 43    | 30   | 0    | 28%         | 4.71E-39 |
|                     | D13-10              | 84              | 84    | 0    | 0    | 0%          | 3.85E-02 |
|                     | D13-13*             | 54              | 45    | 7    | 2    | 17%         | 1.21E-07 |
|                     | D13-14*             | 66              | 49    | 11   | 6    | 26%         | 8.45E-15 |
|                     | D13-19              | 94              | 87    | 4    | 3    | 7%          | 1.30E-01 |
|                     | D13-20*             | 123             | 96    | 27   | 0    | 22%         | 1.00E-30 |
|                     | D13-26              | 99              | 95    | 3    | 1    | 4%          | 5.25E-01 |
|                     | D13-53              | 73              | 71    | 1    | 0    | 1%          | 1.90E-02 |
|                     | D13-56              | 64              | 64    | 0    | 0    | 0%          | 9.00E-04 |
|                     | D13-64              | 60              | 56    | 3    | 1    | 7%          | 4.69E-04 |
|                     | D13-81              | 76              | 76    | 0    | 0    | 0%          | 1.52E-02 |
|                     | P21-49              | 68              | 65    | 3    | 0    | 4%          | 9.52E-03 |
|                     | O16-52              | 74              | 68    | 6    | 0    | 8%          | 1.47E-02 |

\*Asterisks next to the strain name indicate significant difference from wild-type zygotes (CJU10-J1 x CC-2663) based on *chi*-square test ( $p$ -value < 1.0E-6).



**Supplementary Table 2.** Genetic analysis of cpDNA inheritance for testing the “protector” function of the *OTU2p* and *OTU2m* coding segments

| Strain ID       | # zygote | UPp (eryR) | BP | UPm (specR) | (UPm + BP) | <i>P</i> -value |
|-----------------|----------|------------|----|-------------|------------|-----------------|
| Control #1      | 40       | 32         | 2  | 6           | 20%        | n.a.            |
| AR::cOTU2p_#1   | 24       | 9          | 3  | 12          | 63%        | 1.94E-06        |
| AR::cOTU2p_#7*  | 34       | 1          | 3  | 30          | 97%        | 2.48E-25        |
| AR::cOTU2p_#8*  | 27       | 6          | 3  | 18          | 78%        | 8.03E-11        |
| AR::cOTU2p_#9*  | 24       | 4          | 4  | 16          | 83%        | 7.07E-11        |
| AR::cOTU2p_#10* | 39       | 3          | 3  | 33          | 92%        | 7.31E-29        |
| AR::cOTU2p_#11* | 26       | 3          | 2  | 21          | 88%        | 1.63E-13        |
| AR::cOTU2p_#15  | 98       | 79         | 7  | 12          | 19%        | 4.57E-20        |
| AR::cOTU2p_#16  | 78       | 76         | 0  | 2           | 3%         | 7.49E-16        |
| AR::cOTU2p_#17  | 31       | 22         | 1  | 8           | 29%        | 7.14E-02        |
| AR::cOTU2p_#19  | 49       | 48         | 0  | 1           | 2%         | 1.71E-04        |
| AR::cOTU2p_#20  | 61       | 51         | 3  | 7           | 16%        | 5.98E-04        |
| AR::cOTU2p_#21  | 27       | 13         | 6  | 8           | 52%        | 7.11E-05        |
| AR::cOTU2p_#22  | 29       | 13         | 11 | 5           | 55%        | 1.13E-05        |
| AR::cOTU2p_#23* | 39       | 13         | 13 | 13          | 67%        | 6.20E-13        |
| AR::cOTU2p_#24  | 22       | 18         | 4  | 0           | 18%        | 4.37E-03        |

| Strain ID      | # zygote | UPp (eryR) | BP | UPm (specR) | (UPm + BP) | <i>P</i> -value |
|----------------|----------|------------|----|-------------|------------|-----------------|
| Control #1     | 83       | 72         | 8  | 3           | 13%        | n.a.            |
| Control #2     | 93       | 86         | 7  | 0           | 8%         | n.a.            |
| AR::cOTU2m_#2  | 96       | 92         | 2  | 2           | 4%         | 5.59E-10        |
| AR::cOTU2m_#3  | 76       | 72         | 3  | 1           | 5%         | 3.05E-14        |
| AR::cOTU2m_#4  | 98       | 85         | 3  | 10          | 13%        | 3.11E-09        |
| AR::cOTU2m_#5  | 89       | 78         | 6  | 5           | 12%        | 4.87E-11        |
| AR::cOTU2m_#6  | 96       | 89         | 1  | 6           | 7%         | 1.27E-09        |
| AR::cOTU2m_#7  | 34       | 30         | 0  | 4           | 12%        | 9.70E-27        |
| AR::cOTU2m_#8  | 92       | 86         | 5  | 1           | 7%         | 1.68E-10        |
| AR::cOTU2m_#9  | 96       | 88         | 6  | 2           | 8%         | 1.47E-09        |
| AR::cOTU2m_#10 | 41       | 39         | 2  | 0           | 5%         | 2.18E-24        |
| AR::cOTU2m_#11 | 54       | 50         | 4  | 0           | 7%         | 3.45E-20        |
| AR::cOTU2m_#12 | 81       | 72         | 4  | 5           | 11%        | 7.89E-13        |
| AR::cOTU2m_#13 | 98       | 95         | 3  | 0           | 3%         | 8.59E-10        |
| AR::cOTU2m_#14 | 78       | 70         | 6  | 2           | 10%        | 1.50E-13        |
| AR::cOTU2m_#15 | 86       | 80         | 6  | 0           | 7%         | 9.13E-12        |
| AR::cOTU2m_#16 | 104      | 90         | 12 | 2           | 13%        | 3.99E-08        |

(a) Asterisks indicate significant increase in exceptional zygote (UPm + BP) rates by chi-square test ( $p$ -value  $< 1.0E-6$ ). AR::cOTU2p #8, 10, and 23 and AR::cOTU2m #2, 6, and 12, showing comparable transgene expression with endogenous *OTU2*, were designated as A, B, and C, used in other experiments.

**Supplementary Table 3.** Summary of the detailed mating data described in this study

| Cross                 |                       | Mating efficiency | % <sup>a</sup> |            |            |           | Total QFC counted |
|-----------------------|-----------------------|-------------------|----------------|------------|------------|-----------|-------------------|
| <i>plus</i>           | <i>minus</i>          | % <sup>a</sup>    | UP+ %          | UP- %      | BP %       | No%       |                   |
| <b>Figure 1</b>       |                       |                   |                |            |            |           |                   |
| Haploid MT+           | Haploid MT-           | 91.2 ± 1.3        | 85.0 ± 1.3     | 0.00       | 15.0 ± 1.3 | 0.0       | 608               |
| Haploid MT+           | MT+/MT-               | 88.5 ± 0.8        | 10.4 ± 4.1     | 1.3 ± 0.8  | 88.3 ± 4.8 | 0.0       | 1015              |
| Haploid MT+           | MT-/MT-               | 89.0 ± 1.6        | 78.5 ± 1.3     | 2.5 ± 0.5  | 19.0 ± 0.9 | 0.0       | 438               |
| <b>Figure 2b</b>      |                       |                   |                |            |            |           |                   |
| WT                    | cOTU2p                | 90.9 ± 1.1        | 12.2 ± 1.4     | 1.5 ± 0.8  | 86.3 ± 1.2 | 0.0       | 666               |
| WT                    | cOTU2m                | 89.3 ± 0.8        | 81.1 ± 3.2     | 0.0        | 18.9 ± 3.2 | 0.0       | 416               |
| <b>Figure 2c</b>      |                       |                   |                |            |            |           |                   |
| WT                    | WT                    | 92.5 ± 0.2        | 81.9 ± 1.8     | 0.2 ± 0.4  | 17.9 ± 2.2 | 0.0       | 543               |
| otu2p                 | WT                    | 89.2 ± 1.6        | 13.5 ± 2.8     | 1.1 ± 0.9  | 85.3 ± 2.1 | 0.0       | 770               |
| otu2p                 | otu2m                 | 87.2 ± 1.3        | 10.2 ± 1.2     | 3.6 ± 0.9  | 84.6 ± 0.6 | 1.6 ± 0.6 | 866               |
| <b>Figure 2d</b>      |                       |                   |                |            |            |           |                   |
| otu2p;<br>cOTU2p      | otu2m                 | 89.4 ± 1.2        | 88.0 ± 0.2     | 1.2 ± 0.4  | 10.8 ± 0.4 | 0.0       | 866               |
| otu2p                 | otu2m;<br>cOTU2p      | 87.3 ± 0.4        | 2.6 ± 0.8      | 82.9 ± 3.3 | 14.6 ± 3.3 | 0.0       | 738               |
| otu2p;<br>cOTU2m      | otu2m                 | 87.6 ± 0.6        | 11.2 ± 0.3     | 0.8 ± 0.1  | 87.1 ± 0.4 | 0.9 ± 0.3 | 879               |
| otu2p                 | otu2m;<br>cOTU2m      | 88.5 ± 0.4        | 13.4 ± 0.7     | 1.3 ± 0.9  | 83.9 ± 1.6 | 1.3 ± 0.5 | 743               |
| <b>Figure 5c</b>      |                       |                   |                |            |            |           |                   |
| WT (mock)             | WT (mock)             | 89.6 ± 2.2        | 82.4 ± 1.0     | 0.0        | 17.6 ± 1.0 | 0.0       | 1093              |
| WT (MG132)            | WT (mock)             | 88.8 ± 0.9        | 83.5 ± 1.3     | 0.0        | 16.5 ± 1.3 | 0.0       | 423               |
| WT<br>(bortezomib)    | WT (mock)             | 88.1 ± 1.8        | 85.9 ± 1.8     | 0.0        | 83.9 ± 1.8 | 0.0       | 706               |
| WT (mock)             | WT (MG132)            | 88.6 ± 0.9        | 19.1 ± 1.7     | 0.0        | 80.9 ± 1.7 | 0.0       | 371               |
| WT (mock)             | WT<br>(bortezomib)    | 87.2 ± 1.2        | 13.0 ± 0.7     | 0.0        | 87.0 ± 0.7 | 0.0       | 766               |
| <b>Figure 5d</b>      |                       |                   |                |            |            |           |                   |
| otu2p<br>(mock)       | otu2m                 | 89.6 ± 0.9        | 15.5 ± 4.6     | 0.8 ± 0.4  | 83.7 ± 4.4 | 0.0       | 617               |
| otu2p<br>(MG132)      | otu2m                 | 88.2 ± 1.0        | 81.2 ± 0.4     | 1.8 ± 0.2  | 17.0 ± 0.4 | 0.0       | 441               |
| otu2p                 | otu2m<br>(mock)       | 89.6 ± 0.9        | 17.3 ± 1.7     | 4.1 ± 0.8  | 78.7 ± 1.7 | 0.0       | 435               |
| otu2p                 | otu2m<br>(MG132)      | 88.0 ± 0.5        | 1.0 ± 0.6      | 82.0 ± 1.8 | 17.1 ± 1.3 | 0.0       | 424               |
| otu2p<br>(bortezomib) | otu2m                 | 86.1 ± 0.7        | 85.2 ± 0.8     | 1.2 ± 0.5  | 13.7 ± 0.5 | 0.00      | 689               |
| otu2p                 | otu2m<br>(bortezomib) | 85.6 ± 1.5        | 0.8 ± 0.3      | 84.7 ± 1.0 | 14.6 ± 1.1 | 0.00      | 653               |

(a) % values show the average ± s.d. from three biological replicates.

**Supplementary Table 4.** Zygote-specific genes encoding chloroplast-localized proteins

| Gene ID                                 | FPKM<br>(V-G-Z) <sup>a</sup> | Gene Name            | Predicted<br>locale <sup>b</sup> | (c) | (d) | Annotation             |
|-----------------------------------------|------------------------------|----------------------|----------------------------------|-----|-----|------------------------|
| <b>a. Putative DNA-binding proteins</b> |                              |                      |                                  |     |     |                        |
| Cre06.g255750                           | 0-0-1334                     | EZY1c                | C                                | C   | cTP | Localized to nucleoids |
| Cre06.g255650                           | 0-1-411                      | EZY1b                | C                                | C   | cTP | Localized to nucleoids |
| Cre06.g255600                           | 0-1-254                      | EZY1a                | C                                | C   | cTP | Localized to nucleoids |
| Cre02.g091550                           | 46-33-868                    | EZY18/Whirly         | CM                               | M   | cTP | Localized to nucleoids |
| Cre07.g314650                           | 41-36-408                    | EZY19/RECA           | C                                | C   | cTP | Localized to nucleoids |
| Cre12.g483720                           | 0-0-127                      | OSB2/PTAC9           | CM                               | C   | mTP | Divergent              |
| <b>b. Topoisomerases</b>                |                              |                      |                                  |     |     |                        |
| Cre10.g442850                           | 2-5-17                       | TOP-HMGbox, topo IA1 | CM                               | C   | mTP |                        |
| Cre04.g221650                           | 1-1-13                       | Topo IV (GYRA)       | C                                | C   | cTP |                        |
| Cre10.g440750                           | 4-1-45                       | Topo IV (GYRB)       | O                                | O   | mTP |                        |
| <b>c. Candidate helicases</b>           |                              |                      |                                  |     |     |                        |
| Cre06.g296150                           | 3-3-23                       | PIF1-type helicase   | CM                               | C   | mTP | PIF1 domain only       |
| Cre06.g256700                           | 1-1-38                       | AAA_helicase         | C                                | C   | cTP | Divergent              |
| Cre06.g256650                           | 0-0-13                       | AAA_helicase         | M                                | M   | mTP | Divergent              |
| <b>d. DNA replication enzymes</b>       |                              |                      |                                  |     |     |                        |
| Cre17.g736150                           | 1-0-14                       | DNA polymerase       | M                                | M   | mTP | Divergent              |

(a) Annotation and RNA-seq-based expression measures (FPKM) are taken from Joo et al. (4).

(b) Predicted organellar localization is indicated as C (Chloroplast), M (Mitochondria), or O (others).

(c) Prediction by TargetP (<https://services.healthtech.dtu.dk/service.php?TargetP-2.0>).

(d) Prediction by PredAlgo (<http://lobosphaera.ibpc.fr/cgi-bin/predalgotdb2.perl?page=main>).

**Supplementary Table 5.** Genetic linkage of OTU2 homologs to the mating-type loci in Volvocine algae

| Genome                                      | OTU2    | MT-linkage | mating-type (location) | MTD1       | SAD1    |
|---------------------------------------------|---------|------------|------------------------|------------|---------|
| <i>C. reinhardtii</i> <sup>a</sup>          | MT+/MT- | Yes        | MT+ (Ch6)              | MT-        | MT+/MT- |
| <i>C. incerta</i> <sup>b</sup>              | C0033   | Yes        | MT- (C0033)            | C0033      | C0033   |
| <i>C. schloesseri</i> <sup>b</sup>          | C0045   | Yes        | MT- (C0045)            | C0045      | C0045   |
| <i>Edaphochlamys debaryana</i> <sup>b</sup> | C0043   | Yes        | MT- (C0043)            | C0043      | C0043   |
| <i>Gonium pectorale</i> <sup>c</sup>        | C000113 | <u>No</u>  | MT- (C000001)          | C000001    | C000143 |
| <i>Volvox carteri</i> <sup>d</sup>          | Sc35    | <u>No</u>  | MT+ (Sc2, Sc38, Sc80)  | Pseudogene | Sc27    |
| <i>Dunaliella salina</i> <sup>e</sup>       | C0044   | Unknown    | MT- (n.d.)             | C0036      | C0945   |

a) De Hoff et al. (2013) (5); b) Craig et al. (2021) (6); c) Hamaji et al. (2016) (7); d) Ferris et al. (2010) (8); e) Polle et al. (2017) (9).

**Supplementary Table 6. List of primers used in this study**

| Name           | Sequence                      | Restriction enzyme tag |
|----------------|-------------------------------|------------------------|
| psbB_qF1       | AGCTGTTTTACCTGTACGTGG         |                        |
| psbB_qR1       | TCTGGAGTTATGAAGGTGTTGC        |                        |
| psbD_qF1       | GCTAACAGTATGGCTCACTCTC        |                        |
| psbD_qR1       | AAGCAACGAATGCCCATAAAC         |                        |
| Cb1p_qF1       | ACATTTCTGACCTCCACATC          |                        |
| Cb1p_qR1       | TGCTGGTGATGTTGAACTCG          |                        |
| RCK1_qF1       | GCCACACCGAGTGGGTGTCGTGCG      |                        |
| RCK1_qR1       | CCTTGCCGCCCCGAGGCGCACAGCG     |                        |
| OTU2_F1        | ACGGCAACTGCTTCTACC            |                        |
| OTU2_F2        | CTTGGCAATCAGGAGGCAG           |                        |
| OTU2_F3        | CATGACCGGGTTGACGGAC           |                        |
| OTU2_F4        | GCACTCGAGATCTGAGCAG           |                        |
| OTU2_F5        | GGTAGTACGGTTCGGCTAC           |                        |
| OTU2_F6        | CATGCATGCTTCGCCGG             |                        |
| OTU2_F7        | CTACAGTACCCTTGCTGGCAG         |                        |
| OTU2_F9        | TACCCGTGGCAACGCGAGTAC         |                        |
| OTU2_F11       | GAGGCGCATCAACTGGAATCG         |                        |
| OTU2_F12       | CTGGACTGTGACAAGCTCATC         |                        |
| OTU2_F13       | CTAGGACGGACCGACTTGGTC         |                        |
| OTU2_F14       | GCAGTCATGGTAGTCACCTTG         |                        |
| OTU2_F16       | ATGGCGCGCAAGGTCCGCGAGA        |                        |
| OTU2_F17       | CAGCGGCTGCTACGCCTTTTG         |                        |
| OTU2_F18       | CATATGACCGGGTTGACGGAC         | NdeI                   |
| OTU2_F21       | AGCAACGGCGCCGAGCCG            |                        |
| OTU2p_R1       | CCGGCGAAGCATGCATG             |                        |
| OTU2m_R1       | CTCTGCTCGGCGCTGTTG            |                        |
| OTU2_R2        | GGTAGAAGCAGTTGCCGTC           |                        |
| OTU2_R3        | CAGCTGCTCAACCTCCAC            |                        |
| OTU2_R4        | GCTGCTCAGATCTCGAGTG           |                        |
| OTU2_R5        | CGTAGCCGAACCGTACTAC           |                        |
| OTU2_R12stop   | gaattcTTATATAATTGCCGCCACTAG   | EcoRI                  |
| OTU2_R12nostop | gaattcTATAATTGCCGCCACTAGTTGC  | EcoRI                  |
| OTU2_R14       | CAGCACACTGGCTTGCACAG          |                        |
| OTU2_R16       | AGGATCCCTGCAGGCGCTGCATCTC     | BamHI                  |
| OTU2_R20       | TGATGATGCCGGGCTGC             |                        |
| OTU2_R21       | GTGCGAAGCGGATCACCTC           |                        |
| OTU2_C904S_F   | GGGGCGACGGCAACAGCTTCTACCGCGCG |                        |
| OTU2_C904S_R   | CGCGCGGTAGAAGCTGTTGCCGTCGCCCC |                        |
| rbcS_T_R1      | AGCGCCTCCATTTACAC             |                        |
| AtOTU1_F1      | catATACGAACGCGTGCCGATTT       | NdeI                   |
| AtOTU1_R1      | gaattcTCATTTCCCCACATTGTCTG    | EcoRI                  |
| OTU2_ko_F1     | CGCGTCGGCCCGCCCTCTG           |                        |
| OTU2_ko_R1p    | GCAGCCGTACTTGGCGCAGTG         |                        |
| OTU2_ko_R1m    | GCAGCCGTACTCGACGCAGTG         |                        |

## Supplementary References 1–9

1. Kuroiwa, T., Kawano, S., Nishibayashi, S. & Sato, C. Epifluorescent microscopic evidence for maternal inheritance of chloroplast DNA. *Nature* **298**, 481-483 (1982).
2. Matagne, R. F. & Mathieu, D. Transmission of chloroplast genes in triploid and tetraploid zygospores of *Chlamydomonas reinhardtii*: roles of mating-type gene dosage and gametic chloroplast DNA content. *Proc. Natl. Acad. Sci. U. S. A.* **80**, 4780-4783 (1983).
3. Ferris, P. J., Armbrust, E. V. & Goodenough, U. W. Genetic structure of the mating-type locus of *Chlamydomonas reinhardtii*. *Genetics* **160**, 181-200 (2002).
4. Joo, S. et al. Gene regulatory networks for the haploid-to-diploid transition of *Chlamydomonas reinhardtii*. *Plant Physiol.* **175**, 314-332 (2017).
5. De Hoff, P. L. et al. Species and population level molecular profiling reveals cryptic recombination and emergent asymmetry in the dimorphic mating locus of *C. reinhardtii*. *PLoS Genet.* **9**, e1003724. <https://doi.org/10.1371/journal.pgen.1003724> (2013).
6. Craig, R. J., Hasan, A. R., Ness, R. W. & Keightley, P. D. Comparative genomics of *Chlamydomonas*. *Plant Cell* **33**, 1016-1041 (2021).
7. Hamaji, T. et al. Sequence of the *Gonium pectorale* Mating Locus reveals a complex and dynamic history of changes in Volvocine algal mating haplotypes. *G3 Genes Genomes Genet.* **6**, 1179–1189 (2016).
8. Ferris, P. et al. Evolution of an Expanded Sex-Determining Locus in *Volvox*. *Science* **328**, 351–354 (2010).
9. Polle, J. E. W. et al. Draft nuclear genome sequence of the halophilic and beta-carotene-accumulating green alga *Dunaliella salina* Strain CCAP19/18. *Genome Announc.* **5**:e01105-17. <https://doi.org/10.1128/genomeA.01105-17> (2017).
